# Supplementary material for: DNA Damage: Quantum Mechanics/Molecular Mechanics Study on the Oxygen Binding and Substrate Hydroxylation Step in AlkB Repair Enzymes
Source: PubMed Central journal article supplement (PMC3994944; doi:10.1002/chem.201303282), 2013-12-11
Supplement: chem0020-0435-sd1.pdf [file chem0020-0435-sd1.pdf]

# **CHEMISTRY**

---

## **A EUROPEAN JOURNAL**

---

### Supporting Information

© Copyright Wiley-VCH Verlag GmbH & Co. KGaA, 69451 Weinheim, 2013

#### **Quantum Mechanics/Molecular Mechanics Study on the Oxygen Binding and Substrate Hydroxylation Step in AlkB Repair Enzymes**

Matthew G. Quesne,<sup>[a]</sup> Reza Latifi,<sup>[a, b]</sup> Luis E. Gonzalez-Ovalle,<sup>[a]</sup> Devesh Kumar,<sup>[c]</sup> and Sam P. de Visser\*<sup>[a]</sup>

chem\_201303282\_sm\_miscellaneous\_information.pdf

## Gaussian Reference

Gaussian 09, Revision **A.1**, Frisch, M. J.; Trucks, G. W.; Schlegel, H. B.; Scuseria, G. E.; Robb, M. A.; Cheeseman, J. R.; Scalmani, G.; Barone, V.; Mennucci, B.; Petersson, G. A.; Nakatsuji, H.; Caricato, M.; Li, X.; Hratchian, H. P.; Izmaylov, A. F.; Bloino, J.; Zheng, G.; Sonnenberg, J. L.; Hada, M.; Ehara, M.; Toyota, K.; Fukuda, R.; Hasegawa, J.; Ishida, M.; Nakajima, T.; Honda, Y.; Kitao, O.; Nakai, H.; Vreven, T.; Montgomery, Jr., J. A.; Peralta, J. E.; Ogliaro, F.; Bearpark, M.; Heyd, J. J.; Brothers, E.; Kudin, K. N.; Staroverov, V. N.; Kobayashi, R.; Normand, J.; Raghavachari, K.; Rendell, A.; Burant, J. C.; Iyengar, S. S.; Tomasi, J.; Cossi, M.; Rega, N.; Millam, J. M.; Klene, M.; Knox, J. E.; Cross, J. B.; Bakken, V.; Adamo, C.; Jaramillo, J.; Gomperts, R.; Stratmann, R. E.; Yazyev, O.; Austin, A. J.; Cammi, R.; Pomelli, C.; Ochterski, J. W.; Martin, R. L.; Morokuma, K.; Zakrzewski, V. G.; Voth, G. A.; Salvador, P.; Dannenberg, J. J.; Dapprich, S.; Daniels, A. D.; Farkas, Ö.; Foresman, J. B.; Ortiz, J. V.; Cioslowski, J.; Fox, D. J. Gaussian, Inc., Wallingford CT, 2009.

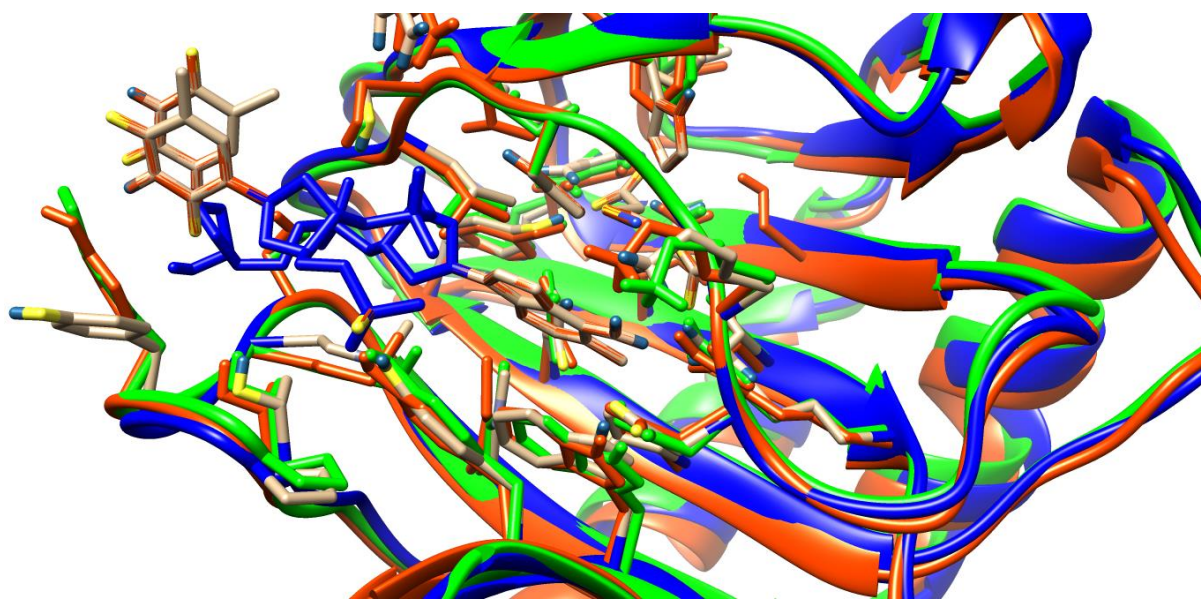

**Figure S1.** Overlay of the snapshots taken from the molecular dynamics simulation. Orange depicts the geometry at 300ps, green is that at 400ps whilst the blue colour represents the structure as seen after 500ps of MD simulation.

**Table S1:** A breakdown of the QM energies, in kcal mol<sup>-1</sup>, reported on the quintet multiplicity of the 500ps snapshot. <sup>5</sup>**R** represents the original trans OXO geometry of the pdb structure, <sup>5</sup>**TS<sub>I</sub>** is the initial rotational barrier leading to the formation of the active cis OXO reactant <sup>5</sup>**R'**. <sup>5</sup>**TS<sub>H</sub>** indicates the limiting activation barrier for hydrogen abstraction from substrate leading to a radical intermediate **I**. The final rebound barrier <sup>5</sup>**TS<sub>reb</sub>** leads to the formation of the hydroxylated product and substrate demethylation.

|                                                        | $\Delta E$ | $\Delta E+ZPE$ | $\Delta E$ | $\Delta E+ZPE$ | $\Delta E$  | $\Delta E+ZPE$ |
|--------------------------------------------------------|------------|----------------|------------|----------------|-------------|----------------|
|                                                        | B3LYP/BS2  |                | B3LYP*     |                | B3LYP/Amber |                |
| <sup>5</sup> <b>R</b>                                  | 0.00       | 0.00           | 0.00       | 0.00           | 0.00        | 0.00           |
| <sup>5</sup> <b>TS<sub>i</sub></b>                     | 6.79       | 8.99           | 5.72       | 7.92           | 4.95        | 7.15           |
| <sup>5</sup> <b>R'</b>                                 | -5.90      | -5.98          | -6.93      | -7.01          | -7.06       | -7.14          |
| <sup>5</sup> <b>TS<sub>H,<math>\pi</math></sub></b>    | 17.86      | 12.61          | 13.48      | 8.22           | 12.71       | 7.46           |
| <sup>5</sup> <b>I<sub><math>\pi</math></sub></b>       | -4.73      | -5.84          | -1.34      | -2.45          | -6.04       | -7.15          |
| <sup>5</sup> <b>TS<sub>reb</sub></b>                   | 5.31       | 7.26           | 6.61       | 8.55           | 3.73        | 5.67           |
| <sup>5</sup> <b>P</b>                                  | -49.27     | -45.01         | -42.65     | -38.39         | -50.51      | -46.26         |
| <sup>5</sup> <b>TS<sub>H,<math>\sigma</math></sub></b> | 17.06      | 12.20          | 12.88      | 8.01           | 10.48       | 5.60           |
| <sup>5</sup> <b>I<sub><math>\sigma</math></sub></b>    | -1.47      | -2.58          | -0.96      | -2.07          | -5.91       | -7.02          |

**Table S2:** The spin state ordering of the QM/MM enzyme system, reported in kcal mol<sup>-1</sup>. The values are relative to the quintet spin state of the 500ps snapshot. The spin state ordering is also related to <sup>5</sup>R' B3LYP/AMBER (BS2).

| Spin state ordering  | singlet | triplet | quintet | Septet |
|----------------------|---------|---------|---------|--------|
| <b>R'</b>            | 39.14   | 17.54   | 0.00    | 17.62  |
| <b>I<sub>π</sub></b> | 64.47   | 12.44   | 1.17    | 4.58   |
| <b>P</b>             | -1.58   | -18.18  | -43.37  | 26.98  |

**Table S3:** The spin state ordering of the QM/MM enzyme system, reported in kcal mol<sup>-1</sup>. The values are relative to the quintet spin states of each snapshot. The spin state ordering of the **R'** species are related to the quintet energies in B3LYP/AMBER (BS2).

| spin state ordering | 300 ps | 400 ps | 500 ps |
|---------------------|--------|--------|--------|
| singlet             | 32.58  | 34.66  | 39.14  |
| triplet             | 7.66   | 9.90   | 17.54  |
| quintet             | 0.00   | 0.00   | 0.00   |
| septet              | 9.17   | 12.26  | 17.62  |

**Table S4:** Breakdown of the rate determining hydrogen abstraction barriers for the QM/MM AMBER:UB3LYP models taken at 300 and 400 picoseconds. All energies are given in kcal/mol<sup>-1</sup> in relation to the <sup>5</sup>R' energies.

|                              | B1<br>$\Delta E$ | B1<br>$\Delta E+ZPE$ | B2<br>$\Delta E$ | B2<br>$\Delta E+ZPE$ | B1<br>$\Delta G$ | B2<br>$\Delta G$ |
|------------------------------|------------------|----------------------|------------------|----------------------|------------------|------------------|
| <b>300 ps</b>                |                  |                      |                  |                      |                  |                  |
| <sup>5</sup> R'              | 0.00             | 0.00                 | 0.00             | 0.00                 | 0.00             | 0.00             |
| <sup>5</sup> TS <sub>H</sub> | 18.98            | 11.33                | 20.66            | 13.01                | 11.12            | 12.80            |
| <b>400 ps</b>                |                  |                      |                  |                      |                  |                  |
| <sup>5</sup> R'              | 0.00             | 0.00                 | 0.00             | 0.00                 | 0.00             | 0.00             |
| <sup>5</sup> TS <sub>H</sub> | 23.14            | 15.31                | 22.92            | 15.09                | 13.38            | 13.16            |

**Table S5:** A breakdown of the spin density for the QM region of the 300, 400 & 500ps snapshots. Group spin densities were calculated for the iron centre (Fe), oxo group (OXO), succinate co-substrate (Succ) as well as the two histidine and one aspartate residues. Group spin densities in each case were assigned from the low spin singlet  $^1R'$  through to the high spin septet  $^7R'$ .

Data for UB3LYP/BS2:

|                     | Fe   | OXO  | Succ  | SubH | HIS1  | HIS2  | ASP  |
|---------------------|------|------|-------|------|-------|-------|------|
| <b>Snapshot 300</b> |      |      |       |      |       |       |      |
| $^1R'$              | 0.00 | 0.00 | 0.00  | 0.00 | 0.00  | 0.00  | 0.00 |
| $^3R'$              | 1.18 | 0.83 | 0.01  | 0.00 | 0.00  | -0.04 | 0.01 |
| $^5R'$              | 2.96 | 0.77 | 0.11  | 0.00 | -0.01 | 0.10  | 0.07 |
| $^7R'$              | 3.99 | 1.26 | 0.35  | 0.00 | 0.08  | 0.11  | 0.20 |
| <b>Snapshot 400</b> |      |      |       |      |       |       |      |
| $^1R'$              | 0.00 | 0.00 | 0.00  | 0.00 | 0.00  | 0.00  | 0.00 |
| $^3R'$              | 1.70 | 0.35 | -0.03 | 0.00 | 0.01  | -0.05 | 0.02 |
| $^5R'$              | 2.94 | 0.78 | 0.13  | 0.00 | -0.01 | 0.08  | 0.08 |
| $^7R'$              | 3.98 | 1.31 | 0.32  | 0.00 | 0.08  | 0.11  | 0.19 |
| <b>Snapshot 500</b> |      |      |       |      |       |       |      |
| $^1R'$              | 0.00 | 0.00 | 0.00  | 0.00 | 0.00  | 0.00  | 0.00 |
| $^3R'$              | 1.68 | 0.37 | -0.04 | 0.00 | 0.01  | -0.04 | 0.02 |
| $^5R'$              | 2.93 | 0.78 | 0.13  | 0.00 | -0.01 | 0.08  | 0.08 |
| $^7R'$              | 3.97 | 1.32 | 0.36  | 0.00 | 0.07  | 0.10  | 0.18 |

**Table S6:** Absolute energies (in au) for the QM/MM calculated structures. ZPE calculated on the QM region only.

|                                | E(B3LYP), BS2<br>(au) | ZPE, BS1<br>(au) | E(B3LYP*),<br>BS1<br>(au) | E(B3LYP), BS1<br>(au) |
|--------------------------------|-----------------------|------------------|---------------------------|-----------------------|
| <sup>5</sup> R                 | -1939.26792           | 0.40006          | -1936.58802               | -1938.77170           |
| <sup>5</sup> TS <sub>i</sub>   | -1939.25709           | 0.40356          | -1936.57890               | -1938.76381           |
| <sup>5</sup> R'                | -1939.27732           | 0.39993          | -1936.59906               | -1938.78295           |
| <sup>5</sup> TS <sub>H,π</sub> | -1939.23945           | 0.39169          | -1936.56654               | -1938.75144           |
| <sup>5</sup> I <sub>π</sub>    | -1939.27545           | 0.39829          | -1936.59015               | -1938.78133           |
| <sup>5</sup> TS <sub>reb</sub> | -1939.25945           | 0.40316          | -1936.57749               | -1938.76576           |
| <sup>5</sup> P                 | -1939.34643           | 0.40684          | -1936.65598               | -1938.85220           |
| <sup>5</sup> TS <sub>H,σ</sub> | -1939.24073           | 0.39229          | -1936.56749               | -1938.75500           |
| <sup>5</sup> I <sub>σ</sub>    | -1939.27026           | 0.39829          | -1936.58955               | -1938.78111           |

**Table S7:** The spin state ordering of the QM/MM enzyme system, reported in kcal mol<sup>-1</sup>. The values are relative to the quintet spin state of the 500ps snapshot. The spin state ordering is also related to <sup>5</sup>R' and is recorder for AMBER combined to a variety of DFT methods, in BS2.

|                   | singlet | triplet | quintet | septet |
|-------------------|---------|---------|---------|--------|
| <b>B3LYP*/BS2</b> | 31.11   | 10.81   | 0.00    | 17.46  |
| <b>BP86/BS2</b>   | 22.65   | 5.54    | 0.00    | 33.71  |
| <b>M06/BS2</b>    | 54.83   | 30.04   | 0.00    | 5.27   |

**Table S8:** A breakdown of the spin density for the QM region of the 500ps snapshot.  ${}^5\mathbf{R}$  represents the original trans OXO geometry of the pdb structure,  ${}^5\mathbf{TS}_I$  is the initial rotational barrier leading to the formation of the active cis OXO reactant  ${}^5\mathbf{R}'$ .  ${}^5\mathbf{TS}_H$  indicates the limiting activation barrier for hydrogen abstraction from substrate leading to a radical intermediate, both the sigma and pi possibilities are shown **I**. The final rebound barrier  ${}^5\mathbf{TS}_{reb}$  leads to the formation of the hydroxylated product and substrate demethylation.

Data for UB3LYP/BS1:

| <b>BS1</b>                   | Fe   | OXO   | Succ | SubH  | HIS1  | HIS2 | ASP  |
|------------------------------|------|-------|------|-------|-------|------|------|
| ${}^5\mathbf{R}$             | 2.84 | 0.86  | 0.14 | 0.00  | 0.10  | 0.00 | 0.06 |
| ${}^5\mathbf{TS}_I$          | 2.82 | 0.88  | 0.12 | 0.00  | 0.08  | 0.07 | 0.03 |
| ${}^5\mathbf{R}'$            | 2.93 | 0.78  | 0.13 | 0.00  | -0.01 | 0.08 | 0.08 |
| ${}^5\mathbf{TS}_{H,\pi}$    | 2.89 | 0.49  | 0.05 | 0.44  | -0.02 | 0.09 | 0.06 |
| ${}^5\mathbf{I}_\pi$         | 2.81 | 0.07  | 0.03 | 0.98  | 0.00  | 0.09 | 0.02 |
| ${}^5\mathbf{TS}_{reb}$      | 3.11 | -0.09 | 0.07 | 0.81  | 0.01  | 0.07 | 0.02 |
| ${}^5\mathbf{P}$             | 3.74 | 0.00  | 0.13 | 0.00  | 0.05  | 0.05 | 0.04 |
| ${}^5\mathbf{TS}_{H,\sigma}$ | 3.97 | 0.01  | 0.25 | -0.53 | 0.09  | 0.10 | 0.10 |
| ${}^5\mathbf{I}_\sigma$      | 4.07 | 0.32  | 0.31 | -0.98 | 0.09  | 0.10 | 0.08 |



**Table S9:** A breakdown of the spin density for the QM region of the 500ps snapshot.  ${}^5\mathbf{R}$  represents the original trans OXO geometry of the pdb structure,  ${}^5\mathbf{TS}_I$  is the initial rotational barrier leading to the formation of the active cis OXO reactant  ${}^5\mathbf{R}'$ .  ${}^5\mathbf{TS}_H$  indicates the limiting activation barrier for hydrogen abstraction from substrate leading to a radical intermediate, both the sigma and pi possibilities are shown **I**. The final rebound barrier  ${}^5\mathbf{TS}_{reb}$  leads to the formation of the hydroxylated product and substrate demethylation.

Data for UB3LYP/BS2:

| <b>BS2</b>                   | Fe   | OXO   | Succ | SubH  | HIS1  | HIS2 | ASP  |
|------------------------------|------|-------|------|-------|-------|------|------|
| ${}^5\mathbf{R}$             | 2.96 | 0.75  | 0.13 | 0.00  | 0.09  | 0.00 | 0.07 |
| ${}^5\mathbf{TS}_I$          | 2.89 | 0.84  | 0.07 | 0.00  | 0.09  | 0.08 | 0.04 |
| ${}^5\mathbf{R}'$            | 3.01 | 0.69  | 0.14 | 0.00  | -0.02 | 0.08 | 0.08 |
| ${}^5\mathbf{TS}_{H,\pi}$    | 3.52 | 0.14  | 0.06 | 0.07  | 0.03  | 0.11 | 0.05 |
| ${}^5\mathbf{I}_\pi$         | 2.82 | 0.07  | 0.03 | 0.99  | -0.01 | 0.10 | 0.01 |
| ${}^5\mathbf{TS}_{reb}$      | 2.88 | -0.01 | 0.05 | 0.96  | 0.00  | 0.09 | 0.03 |
| ${}^5\mathbf{P}$             | 3.77 | 0.00  | 0.10 | 0.00  | 0.05  | 0.06 | 0.03 |
| ${}^5\mathbf{TS}_{H,\sigma}$ | 4.08 | -0.04 | 0.21 | -0.51 | 0.08  | 0.09 | 0.10 |
| ${}^5\mathbf{I}_\sigma$      | 4.17 | 0.28  | 0.25 | -0.98 | 0.10  | 0.10 | 0.08 |

**Table S10:** A breakdown of the spin density for the 500ps snapshot.  ${}^5\mathbf{R}$  represents the original trans OXO geometry of the pdb structure,  ${}^5\mathbf{TS}_I$  is the initial rotational barrier leading to the formation of the active cis OXO reactant  ${}^5\mathbf{R}'$ .  ${}^5\mathbf{TS}_H$  indicates the limiting activation barrier for hydrogen abstraction from substrate leading to a radical intermediate, both the sigma and pi possibilities are shown **I**. The final rebound barrier  ${}^5\mathbf{TS}_{reb}$  leads to the formation of the hydroxylated product and substrate demethylation.

Data for UB3LYP\*/BS1:

| <b>B3LYP*</b>                | Fe   | OXO   | Succ | SubH  | HIS1  | HIS2 | ASP  |
|------------------------------|------|-------|------|-------|-------|------|------|
| ${}^5\mathbf{R}$             | 2.84 | 0.83  | 0.16 | 0.00  | 0.10  | 0.00 | 0.07 |
| ${}^5\mathbf{TS}_I$          | 2.85 | 0.85  | 0.10 | 0.00  | 0.08  | 0.07 | 0.04 |
| ${}^5\mathbf{R}'$            | 2.92 | 0.76  | 0.16 | 0.00  | -0.01 | 0.08 | 0.09 |
| ${}^5\mathbf{TS}_{H,\pi}$    | 2.88 | 0.83  | 0.11 | 0.01  | 0.00  | 0.11 | 0.08 |
| ${}^5\mathbf{I}_\pi$         | 2.81 | 0.07  | 0.03 | 0.98  | 0.00  | 0.09 | 0.02 |
| ${}^5\mathbf{TS}_{reb}$      | 3.08 | -0.07 | 0.12 | 0.77  | 0.01  | 0.06 | 0.02 |
| ${}^5\mathbf{P}$             | 3.71 | 0.00  | 0.14 | 0.00  | 0.05  | 0.05 | 0.05 |
| ${}^5\mathbf{TS}_{H,\sigma}$ | 3.88 | 0.06  | 0.25 | -0.49 | 0.08  | 0.10 | 0.10 |
| ${}^5\mathbf{I}_\sigma$      | 4.04 | 0.33  | 0.32 | -0.98 | 0.10  | 0.11 | 0.08 |

**Data related to the DFT calculations of model complexes for hydroxylation of methylated cytosine (Cyt), thymine (Thy), guanine (Gua) and adenine (Ade).** These structures were optimized without geometric constraints in Gaussian-09 and followed by a frequency calculation at UB3LYP/B1. A subsequent single point calculation used an LACV3P+ basis set on Fe and 6-311+G\* on the rest of the atoms, basis set B3. Energies reported here, use the latter energy and include a correction for the zero-point energy as taken from the frequency calculations.

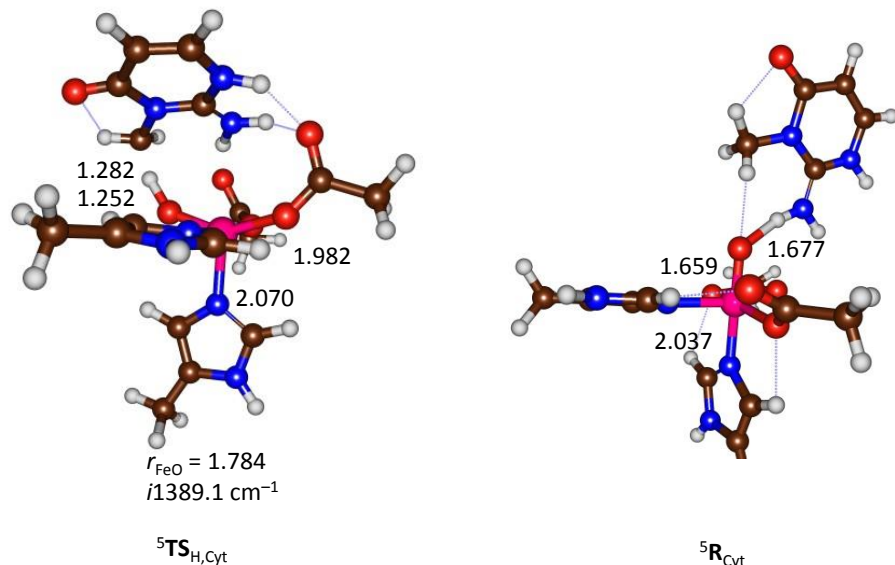

**Figure S2.** Optimized DFT geometries (UB3LYP/LACVP) of small active site model with distances in angstroms of the reactant complex and rate determining transition state of AlkB repair active site with **cytosine**. The imaginary frequency in the TS is given in wave numbers.

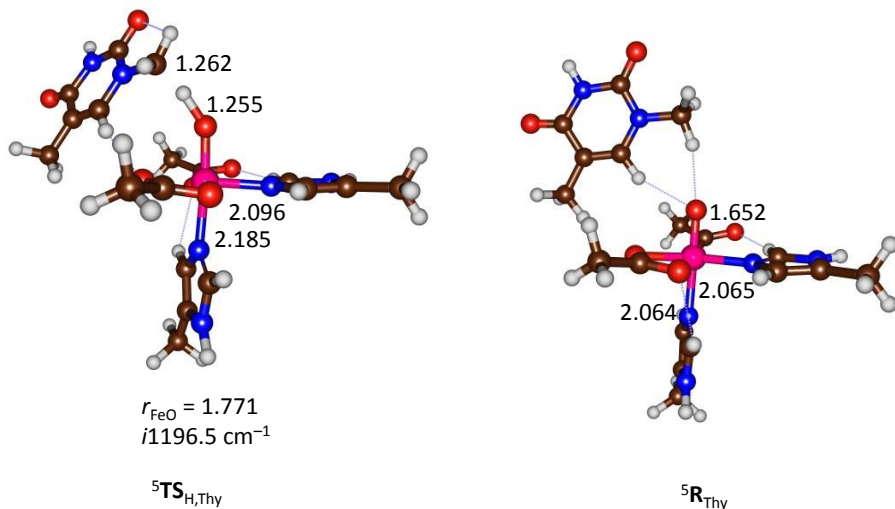

**Figure S3.** Optimized DFT geometries (UB3LYP/LACVP) of small active site model with distances in angstroms of the reactant complex and rate determining transition state of AlkB repair active site with **thymine**. The imaginary frequency in the TS is given in wave numbers.

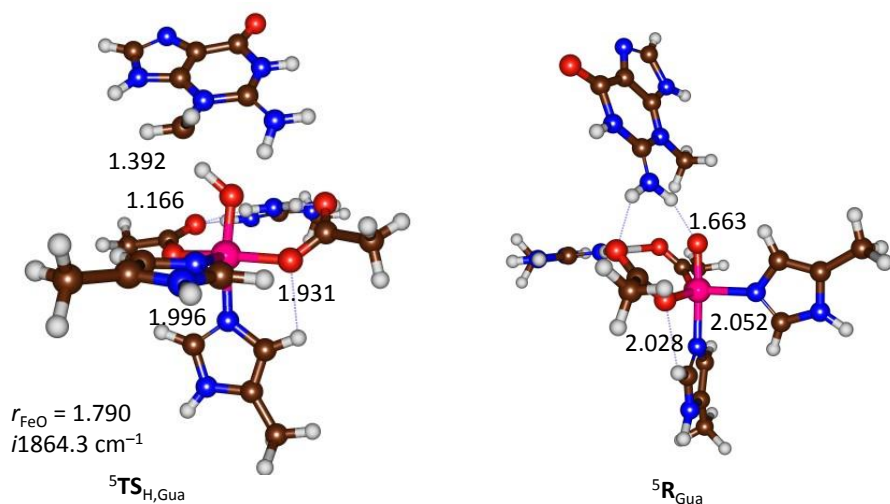

**Figure S4.** Optimized DFT geometries (UB3LYP/LACVP) of small active site model with distances in angstroms of the reactant complex and rate determining transition state of AlkB repair active site with **guanine**. The imaginary frequency in the TS is given in wave numbers.

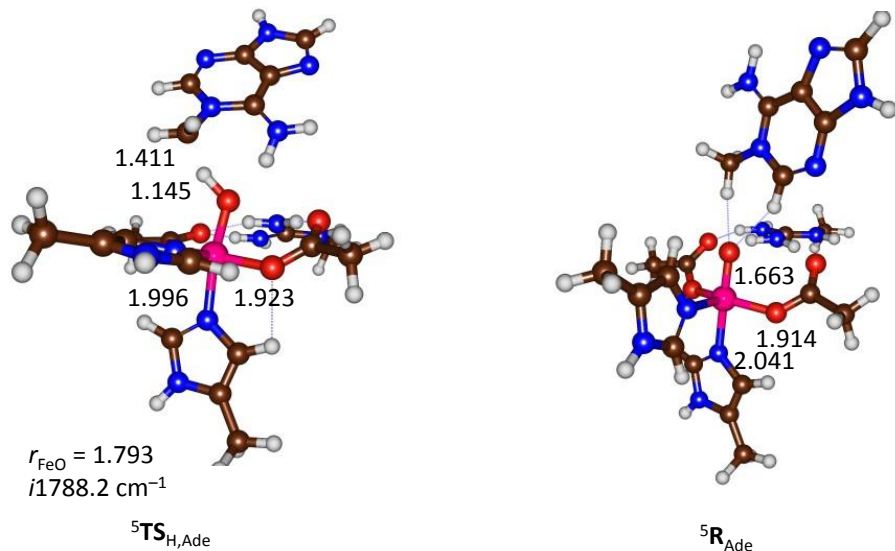

**Figure S5.** Optimized DFT geometries (UB3LYP/LACVP) of small active site model with distances in angstroms of the reactant complex and rate determining transition state of AlkB repair active site with **adenine**. The imaginary frequency in the TS is given in wave numbers.

**Table S11:** Group spin densities and charges of UB3LYP/B1 optimized geometries in Gaussian.

| Spin                             | $\rho_{\text{Fe}}$ | $\rho_{\text{O}}$ | $\rho_{\text{His1}}$ | $\rho_{\text{His2}}$ | $\rho_{\text{Asp}}$ | $\rho_{\text{Succ}}$ | $\rho_{\text{SubH}}$ |
|----------------------------------|--------------------|-------------------|----------------------|----------------------|---------------------|----------------------|----------------------|
| <sup>5</sup> R <sub>Cyt</sub>    | 3.07               | 0.60              | 0.08                 | -0.01                | 0.11                | 0.14                 | 0.00                 |
| <sup>5</sup> TS <sub>H,Cyt</sub> | 3.91               | 0.04              | 0.07                 | 0.11                 | 0.17                | 0.14                 | -0.45                |
| <sup>5</sup> R <sub>Thy</sub>    | 3.00               | 0.69              | 0.05                 | -0.01                | 0.10                | 0.17                 | 0.00                 |
| <sup>5</sup> TS <sub>H,Thy</sub> | 3.90               | 0.09              | 0.08                 | 0.05                 | 0.14                | 0.18                 | -0.44                |
| <sup>5</sup> R <sub>Gua</sub>    | 2.97               | 0.71              | -0.01                | 0.10                 | 0.11                | 0.13                 | -0.01                |
| <sup>5</sup> TS <sub>H,Gua</sub> | 2.86               | 0.42              | -0.01                | 0.12                 | 0.04                | 0.05                 | 0.53                 |
| <sup>5</sup> R <sub>Ade</sub>    | 2.98               | 0.69              | -0.01                | 0.10                 | 0.11                | 0.13                 | 0.00                 |
| <sup>5</sup> TS <sub>H,Ade</sub> | 2.86               | 0.42              | 0.00                 | 0.11                 | 0.04                | 0.05                 | 0.52                 |

| Charges                          | Q <sub>Fe</sub> | Q <sub>O</sub> | Q <sub>His1</sub> | Q <sub>His2</sub> | Q <sub>Asp</sub> | Q <sub>Succ</sub> | Q <sub>Succ</sub> |
|----------------------------------|-----------------|----------------|-------------------|-------------------|------------------|-------------------|-------------------|
| <sup>5</sup> R <sub>Cyt</sub>    | 0.91            | -0.45          | 0.21              | 0.28              | -0.41            | -0.44             | 0.89              |
| <sup>5</sup> TS <sub>H,Cyt</sub> | 1.14            | -0.25          | 0.21              | 0.23              | -0.45            | -0.54             | 0.67              |
| <sup>5</sup> R <sub>Thy</sub>    | 0.89            | -0.36          | 0.18              | 0.23              | -0.40            | -0.50             | -0.05             |
| <sup>5</sup> TS <sub>H,Thy</sub> | 1.04            | -0.20          | 0.15              | 0.17              | -0.48            | -0.54             | -0.14             |
| <sup>5</sup> R <sub>Gua</sub>    | 1.04            | -0.43          | 0.32              | 0.27              | -0.48            | 0.41              | 0.87              |
| <sup>5</sup> TS <sub>H,Gua</sub> | 1.00            | -0.24          | 0.97              | 0.23              | -0.46            | 0.39              | 0.11              |
| <sup>5</sup> R <sub>Ade</sub>    | 1.04            | -0.42          | 0.30              | 0.25              | -0.48            | 0.39              | 0.92              |
| <sup>5</sup> TS <sub>H,Ade</sub> | 0.99            | -0.23          | 0.32              | 0.22              | -0.46            | 0.41              | 0.75              |

**Table S12:** Group spin densities and charges of UB3LYP/B2//UB3LYP/B1 calculations in Gaussian.

| Spin                             | $\rho_{\text{Fe}}$ | $\rho_{\text{O}}$ | $\rho_{\text{His1}}$ | $\rho_{\text{His2}}$ | $\rho_{\text{Asp}}$ | $\rho_{\text{Succ}}$ | $\rho_{\text{SubH}}$ |
|----------------------------------|--------------------|-------------------|----------------------|----------------------|---------------------|----------------------|----------------------|
| <sup>5</sup> R <sub>Cyt</sub>    | 3.20               | 0.58              | 0.05                 | -0.08                | 0.11                | 0.14                 | -0.01                |
| <sup>5</sup> TS <sub>H,Cyt</sub> | 3.93               | 0.04              | 0.07                 | 0.08                 | 0.17                | 0.11                 | -0.40                |
| <sup>5</sup> R <sub>Thy</sub>    | 3.12               | 0.68              | 0.02                 | -0.08                | 0.11                | 0.16                 | -0.01                |
| <sup>5</sup> TS <sub>H,Thy</sub> | 4.05               | 0.05              | 0.01                 | 0.00                 | 0.14                | 0.16                 | -0.41                |
| <sup>5</sup> R <sub>Gua</sub>    | 3.10               | 0.69              | -0.08                | 0.10                 | 0.09                | 0.11                 | -0.01                |
| <sup>5</sup> TS <sub>H,Gua</sub> | 2.94               | 0.46              | -0.06                | 0.09                 | 0.03                | 0.04                 | 0.50                 |
| <sup>5</sup> R <sub>Ade</sub>    | 3.15               | 0.67              | -0.10                | 0.09                 | 0.09                | 0.10                 | 0.00                 |
| <sup>5</sup> TS <sub>H,Ade</sub> | 2.95               | 0.47              | -0.07                | 0.09                 | 0.03                | 0.03                 | 0.50                 |

| Charge                           | Q <sub>Fe</sub> | Q <sub>O</sub> | Q <sub>His1</sub> | Q <sub>His2</sub> | Q <sub>Asp</sub> | Q <sub>Succ</sub> | Q <sub>Succ</sub> |
|----------------------------------|-----------------|----------------|-------------------|-------------------|------------------|-------------------|-------------------|
| <sup>5</sup> R <sub>Cyt</sub>    | -2.60           | 0.76           | 1.06              | 0.68              | 0.04             | 0.20              | 0.86              |
| <sup>5</sup> TS <sub>H,Cyt</sub> | -1.79           | 0.44           | 0.86              | 0.85              | 0.25             | 0.26              | 0.14              |
| <sup>5</sup> R <sub>Thy</sub>    | -2.80           | 0.89           | 1.03              | 0.50              | 0.06             | 0.35              | -0.03             |
| <sup>5</sup> TS <sub>H,Thy</sub> | -2.64           | 0.71           | 1.18              | 1.00              | -0.29            | 0.37              | -0.31             |
| <sup>5</sup> R <sub>Gua</sub>    | -2.43           | 0.29           | 1.21              | 2.29              | -0.42            | 2.32              | -1.24             |
| <sup>5</sup> TS <sub>H,Gua</sub> | -3.50           | 0.79           | 1.00              | 1.40              | 0.14             | 1.41              | 0.76              |
| <sup>5</sup> R <sub>Ade</sub>    | -2.74           | 0.54           | 0.82              | 1.07              | 0.16             | 1.19              | 0.95              |
| <sup>5</sup> TS <sub>H,Ade</sub> | -3.83           | 0.74           | 1.16              | 1.52              | 0.22             | 1.42              | 0.78              |

**Table S13:** Absolute energies (in au) for UB3LYP/B1 optimized geometries in Gaussian.

|                                  | E, au<br>LACVP   | ZPE, au<br>LACVP | G, au<br>LACVP   | E, au<br>LACV3P+* | Esolv, au<br>LACV3P+* |
|----------------------------------|------------------|------------------|------------------|-------------------|-----------------------|
| <sup>5</sup> R <sub>Cyt</sub>    | -<br>1621.395603 | 0.450904         | -<br>1621.018262 | -<br>1621.856243  | -<br>1621.467341      |
| <sup>5</sup> TS <sub>H,Cyt</sub> | -<br>1621.386894 | 0.444186         | -<br>1621.017510 | -<br>1621.839243  | -<br>1621.450297      |
| <sup>5</sup> R <sub>Thy</sub>    | -<br>1680.183535 | 0.452950         | -<br>1679.809764 | -<br>1680.674030  | -<br>1680.228574      |
| <sup>5</sup> TS <sub>H,Thy</sub> | -<br>1680.160597 | 0.445429         | -<br>1679.791831 | -<br>1680.649063  | -<br>1680.203073      |
| <sup>5</sup> R <sub>Gua</sub>    | -<br>2014.055439 | 0.589636         | -<br>2013.552856 | -<br>2014.630435  | -<br>2014.241848      |
| <sup>5</sup> TS <sub>H,Gua</sub> | -<br>2014.006829 | 0.582484         | -<br>2013.511709 | -<br>2014.578737  | -<br>2014.202472      |
| <sup>5</sup> R <sub>Ade</sub>    | -<br>1938.831416 | 0.585601         | -<br>1938.335761 | -<br>1939.385474  | -<br>1939.003789      |
| <sup>5</sup> TS <sub>H,Ade</sub> | -<br>1938.792231 | 0.578550         | -<br>1938.299071 | -<br>1939.341204  | -<br>1938.965768      |

**Table S14:** Relative energies and free energies of UB3LYP/B1 optimized geometries in Gaussian. Values in kcal/mol.

|                                  | $\Delta E$<br>B1 | $\Delta E+ZPE$<br>B1 | $\Delta G$<br>B1 | $\Delta E$<br>B2 | $\Delta E+ZPE$<br>B2 | $\Delta G$<br>B2 | $\Delta E+ZPE+Es$<br>B2 | $\Delta G+Es$<br>B2 |
|----------------------------------|------------------|----------------------|------------------|------------------|----------------------|------------------|-------------------------|---------------------|
| <sup>5</sup> R <sub>Cyt</sub>    |                  |                      |                  |                  |                      |                  |                         |                     |
| <sup>5</sup> TS <sub>H,Cyt</sub> | 5.47             | 1.25                 | 0.47             | 10.67            | 6.45                 | 5.67             | 6.48                    | 5.70                |
| <sup>5</sup> R <sub>Thy</sub>    |                  |                      |                  |                  |                      |                  |                         |                     |
| <sup>5</sup> TS <sub>H,Thy</sub> | 14.39            | 9.67                 | 11.25            | 15.67            | 10.95                | 12.53            | 11.28                   | 12.86               |
| <sup>5</sup> R <sub>Gua</sub>    |                  |                      |                  |                  |                      |                  |                         |                     |
| <sup>5</sup> TS <sub>H,Gua</sub> | 30.50            | 26.02                | 25.82            | 32.44            | 27.95                | 27.76            | 20.22                   | 20.03               |
| <sup>5</sup> R <sub>Ade</sub>    |                  |                      |                  |                  |                      |                  |                         |                     |
| <sup>5</sup> TS <sub>H,Ade</sub> | 24.59            | 20.16                | 23.02            | 27.78            | 23.36                | 26.21            | 19.43                   | 22.29               |

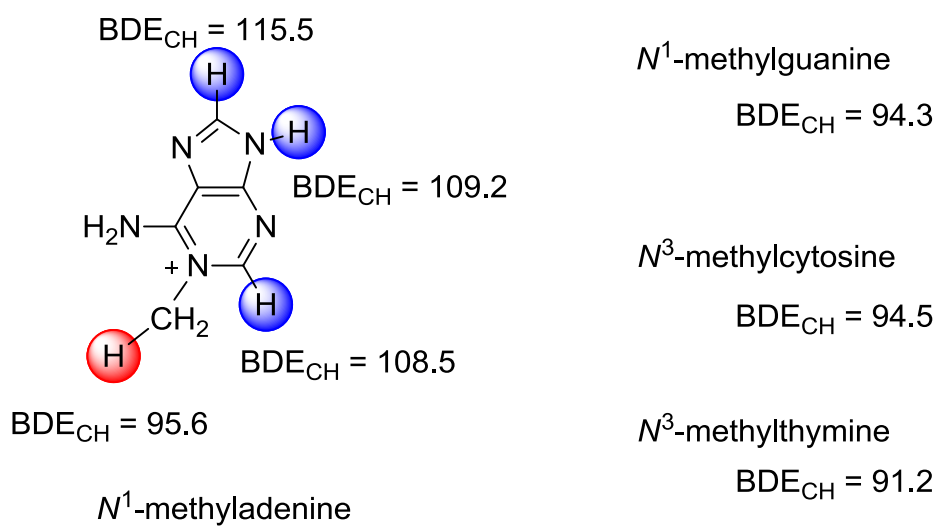

**Figure S6.** DFT calculated bond strengths ( $BDE_{C-H}$ ) at the UB3LYP/B2+ZPE//UB3LYP/B1 level of theory of methylated DNA bases. All values are in  $\text{kcal mol}^{-1}$ .



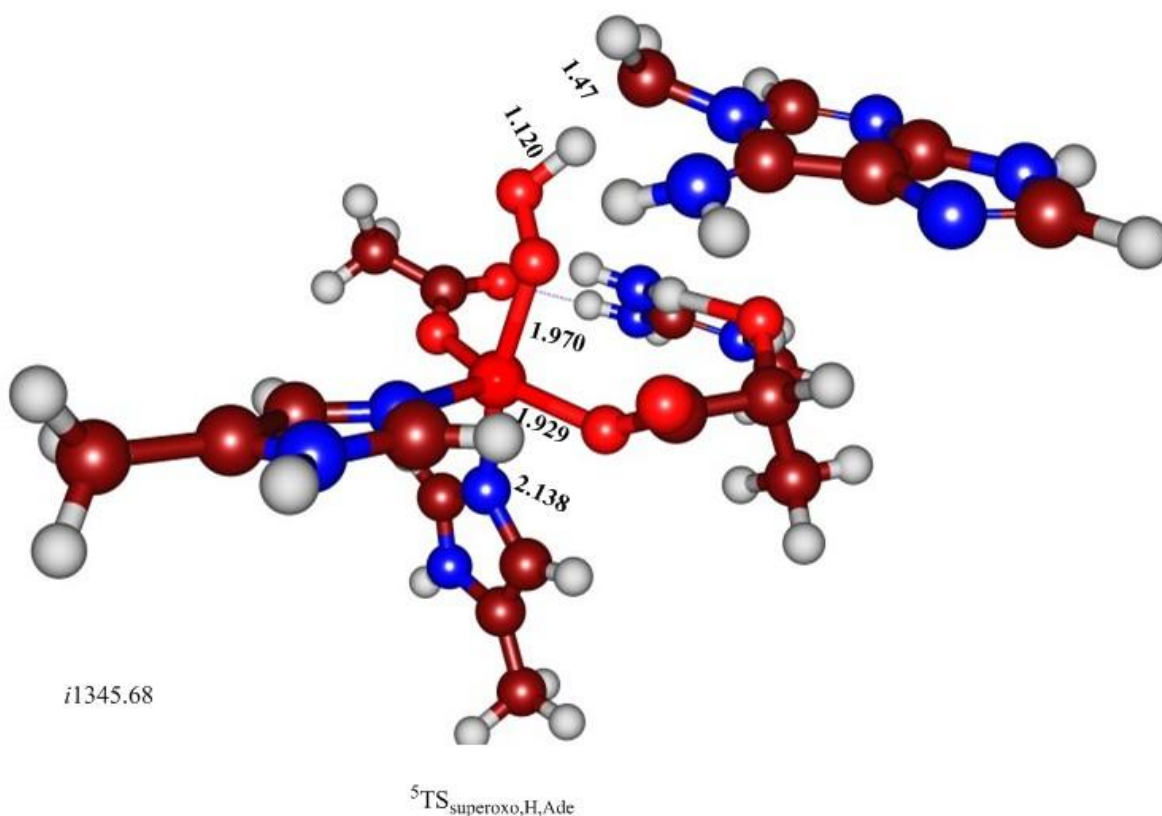

**Figure S7.** Optimized DFT superoxo transition state geometry (UB3LYP/LACVP) of small active site model species with distances in angstroms. The substrate for the AlkB repair active site is **adenine** and the imaginary frequency is given in wave numbers.

**Table S15:** Breakdown of the relative energies of the model superoxo system taken from the coordinates of the QM/MM  ${}^5\text{R}$  species. The barrier for superoxo hydrogen abstraction is calculated using UB3LYP/LACVP and all energies are related to  ${}^5\text{Re}$ . Values are given in Kcal Mol<sup>-1</sup> and the solvent added using the *Gaussian 09* PCM method with a  $\epsilon=5.697$ .

| DNA<br>superoxo          | B1         |                       | B2         |                       | B1         |            | B2                              |                      |
|--------------------------|------------|-----------------------|------------|-----------------------|------------|------------|---------------------------------|----------------------|
|                          | $\Delta E$ | $\Delta E+\text{ZPE}$ | $\Delta E$ | $\Delta E+\text{ZPE}$ | $\Delta G$ | $\Delta G$ | +Esolv<br>$\Delta E+\text{ZPE}$ | +Esolv<br>$\Delta G$ |
| ${}^5\text{R}'$          | 0.00       | 0.00                  | 0.00       | 0.00                  | 0.00       | 0.00       | 0.00                            | 0.00                 |
| ${}^5\text{TS}_\text{H}$ | 33.87      | 30.27                 | 36.39      | 32.78                 | 33.78      | 36.30      | 43.45                           | 46.96                |
| ${}^5\text{I}$           | 23.96      | 22.96                 | 27.33      | 26.33                 | 25.86      | 29.23      | 22.56                           | 25.46                |

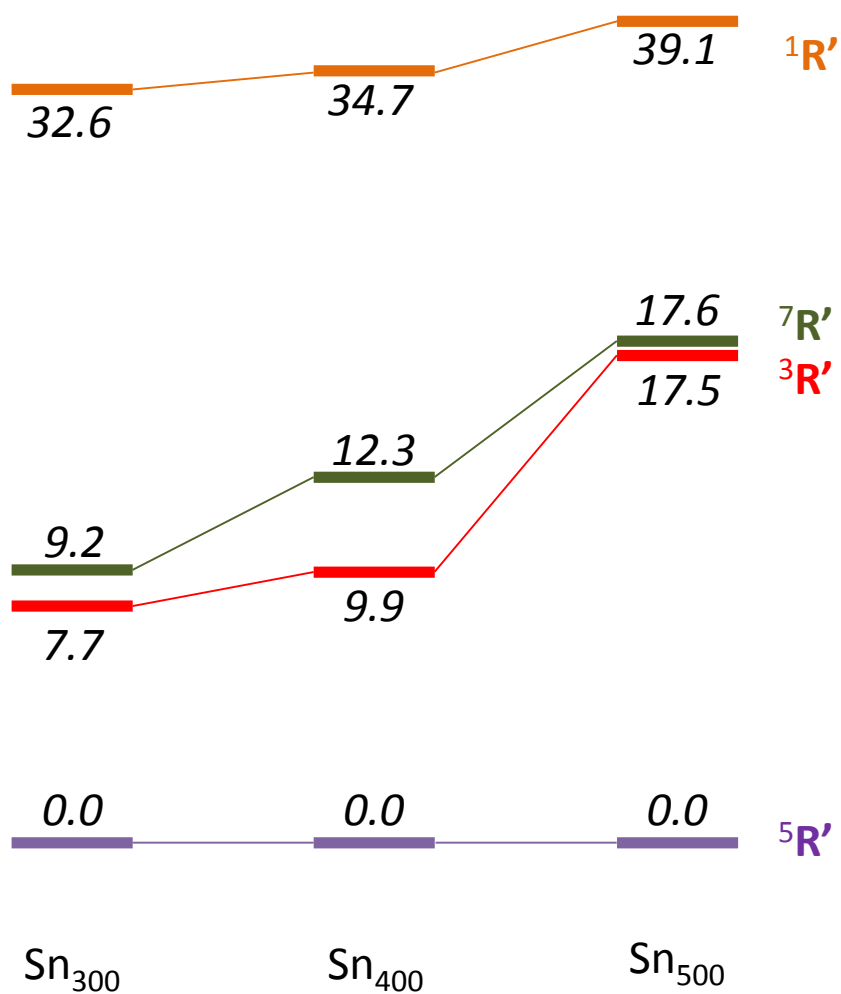

**Figure S8:** Spin state ordering and relative energies (in kcal/mol) of structure  $R'$  as obtained in three different snapshots.

**Cartesian coordinates of all structures described in this work:**

**QM region of QM/MM calculations:**

|                      |              |              |              |                                   |              |              |              |
|----------------------|--------------|--------------|--------------|-----------------------------------|--------------|--------------|--------------|
| <b><sup>5</sup>R</b> |              |              |              |                                   |              |              |              |
| 6                    | -0.113468000 | 1.852096000  | -5.349602000 | 7                                 | -4.809304000 | 2.749147000  | -2.059562000 |
| 1                    | -0.406510000 | 1.270596000  | -6.226445000 | 1                                 | -5.235917000 | 3.339876000  | -2.758389000 |
| 1                    | -0.860281000 | 2.631340000  | -5.215005000 | 1                                 | -4.166202000 | 3.269868000  | -1.467822000 |
| 7                    | 0.669356000  | -0.198394000 | -4.043411000 | 1                                 | 5.706243000  | 1.765698000  | -1.897876000 |
| 1                    | 1.122783000  | -0.645479000 | -4.820115000 | 1                                 | 0.847046000  | 2.328834000  | -5.569398000 |
| 6                    | -0.039733000 | 1.008014000  | -4.108510000 | 1                                 | -3.097954000 | -0.880643000 | -5.901017000 |
| 6                    | 0.662246000  | -0.654173000 | -2.766275000 | 1                                 | 1.554045000  | -4.354825000 | 1.608540000  |
| 1                    | 1.112162000  | -1.557677000 | -2.401602000 | 1                                 | -4.588168000 | 1.539292000  | 6.577692000  |
| 7                    | -0.037462000 | 0.183843000  | -2.000632000 | 1                                 | -1.563346000 | 4.365623000  | 0.477169000  |
| 6                    | -0.483225000 | 1.220593000  | -2.829051000 | <b><sup>5</sup>TS<sub>i</sub></b> |              |              |              |
| 1                    | -1.066166000 | 2.022850000  | -2.424215000 | 7                                 | 2.492426000  | -1.000200000 | 2.914348000  |
| 6                    | -1.901994000 | 3.738488000  | 1.300069000  | 1                                 | 2.534242000  | -1.481232000 | 3.794985000  |
| 1                    | -2.901240000 | 4.041544000  | 1.610391000  | 6                                 | 3.426325000  | -0.077972000 | 2.460123000  |
| 1                    | -1.222484000 | 3.885929000  | 2.143944000  | 6                                 | 1.514345000  | -1.126485000 | 1.996710000  |
| 6                    | -1.876000000 | 2.272179000  | 0.919507000  | 1                                 | 0.641321000  | -1.745569000 | 2.084600000  |
| 8                    | -1.052682000 | 1.852305000  | 0.000827000  | 7                                 | 1.771869000  | -0.364887000 | 0.948071000  |
| 8                    | -2.644220000 | 1.463303000  | 1.544663000  | 6                                 | 2.960132000  | 0.296875000  | 1.229930000  |
| 6                    | 5.487343000  | 1.482312000  | -0.864019000 | 1                                 | 3.379050000  | 0.987317000  | 0.525229000  |
| 1                    | 6.081764000  | 2.126986000  | -0.210162000 | 6                                 | 1.731648000  | 1.953401000  | -2.354183000 |
| 1                    | 5.838416000  | 0.461248000  | -0.721180000 | 8                                 | 1.469103000  | 1.634704000  | -1.132453000 |
| 7                    | 3.275332000  | 2.731134000  | -0.622167000 | 8                                 | 1.561256000  | 1.191692000  | -3.321731000 |
| 1                    | 3.651377000  | 3.638052000  | -0.837537000 | 7                                 | -0.292033000 | 3.376931000  | 2.262107000  |
| 6                    | 4.021095000  | 1.555411000  | -0.558409000 | 1                                 | 0.056534000  | 4.215191000  | 2.692438000  |
| 6                    | 1.968813000  | 2.452270000  | -0.367116000 | 6                                 | -1.351288000 | 2.620950000  | 2.732359000  |
| 1                    | 1.160393000  | 3.156601000  | -0.364195000 | 6                                 | 0.212445000  | 2.797559000  | 1.159380000  |
| 7                    | 1.844061000  | 1.149312000  | -0.112711000 | 1                                 | 1.050396000  | 3.149128000  | 0.590791000  |
| 6                    | 3.110978000  | 0.581280000  | -0.230290000 | 7                                 | -0.484351000 | 1.712306000  | 0.857687000  |
| 1                    | 3.254242000  | -0.470940000 | -0.075488000 | 6                                 | -1.453200000 | 1.591442000  | 1.839950000  |
| 6                    | -4.837887000 | 0.484141000  | 6.455228000  | 1                                 | -2.124873000 | 0.756228000  | 1.835982000  |
| 1                    | -5.870685000 | 0.391683000  | 6.112410000  | 7                                 | -0.630212000 | 0.008346000  | -7.042681000 |
| 1                    | -4.759097000 | 0.000679000  | 7.424641000  | 1                                 | -1.480308000 | -0.519764000 | -6.946882000 |
| 7                    | -3.891970000 | -0.180652000 | 5.534814000  | 6                                 | 0.126729000  | 0.159241000  | -5.944650000 |
| 1                    | -3.392415000 | -0.978246000 | 5.888923000  | 7                                 | 1.316991000  | 0.777456000  | 0.677347000  |
| 6                    | -3.585291000 | 0.233342000  | 4.286010000  | 1                                 | 1.715500000  | 1.065761000  | -6.899198000 |
| 7                    | -4.269467000 | 1.252050000  | 3.723051000  | 1                                 | 1.722043000  | 1.079672000  | -5.130941000 |
| 1                    | -5.060774000 | 1.677825000  | 4.165236000  | 7                                 | -0.297494000 | -0.267510000 | -4.760253000 |
| 1                    | -3.881473000 | 1.609555000  | 2.836126000  | 1                                 | -1.232044000 | -0.625331000 | -4.635485000 |
| 7                    | -2.593637000 | -0.331090000 | 3.589310000  | 1                                 | 0.162205000  | -0.089997000 | -3.832116000 |
| 1                    | -1.980738000 | -1.042706000 | 3.955608000  | 26                                | 0.263948000  | 0.235597000  | -0.449429000 |
| 1                    | -2.277110000 | 0.059631000  | 2.684772000  | 8                                 | -0.111801000 | -0.269580000 | -1.972633000 |
| 26                   | 0.013998000  | 0.176563000  | 0.031634000  | 6                                 | -2.164250000 | -1.223580000 | -0.303769000 |
| 8                    | -0.076820000 | 0.145286000  | 1.695769000  | 8                                 | -2.584278000 | -0.625990000 | -1.272385000 |
| 6                    | 1.542419000  | -3.666648000 | 0.765298000  | 8                                 | -0.994317000 | -0.978076000 | 0.290574000  |
| 1                    | 1.238878000  | -4.200680000 | -0.136813000 | 7                                 | 5.706038000  | -2.984372000 | 1.162877000  |
| 1                    | 2.552333000  | -3.285935000 | 0.596086000  | 6                                 | 3.669918000  | -1.047277000 | -3.499730000 |
| 6                    | 0.582994000  | -2.524999000 | 1.030774000  | 1                                 | 3.251978000  | -1.856301000 | -4.095451000 |
| 8                    | -0.077554000 | -2.429325000 | 2.075697000  | 1                                 | 4.479759000  | -0.567221000 | -4.043021000 |
| 8                    | 0.476389000  | -1.666541000 | -0.020864000 | 1                                 | 2.885741000  | -0.328767000 | -3.274366000 |
| 7                    | -3.364354000 | -0.083706000 | -5.350275000 | 6                                 | 5.637399000  | -1.472569000 | -0.401444000 |
| 6                    | -5.064310000 | 0.634632000  | -0.187606000 | 7                                 | 6.618401000  | -1.055273000 | 0.461050000  |
| 1                    | -5.479459000 | -0.293025000 | 0.203180000  | 6                                 | 6.612343000  | -1.965406000 | 1.400531000  |
| 1                    | -5.825583000 | 1.411443000  | -0.160036000 | 7                                 | 4.209933000  | -1.597367000 | -2.248566000 |
| 1                    | -4.212664000 | 0.926617000  | 0.421788000  | 6                                 | 3.687320000  | -2.765220000 | -1.726690000 |
| 6                    | -4.046550000 | 1.201894000  | -3.717933000 | 1                                 | 2.883962000  | -3.202189000 | -2.299315000 |
| 7                    | -3.801035000 | 2.052492000  | -4.782644000 | 7                                 | 4.076596000  | -3.343921000 | -0.631958000 |
| 6                    | -3.372987000 | 1.251561000  | -5.751243000 | 6                                 | 5.048072000  | -2.669257000 | 0.010437000  |
| 1                    | -3.105856000 | 1.551945000  | -6.746712000 | 6                                 | 5.194465000  | -0.902810000 | -1.596401000 |
| 7                    | -4.676452000 | 0.417046000  | -1.599632000 | 7                                 | 5.721904000  | 0.215283000  | -2.100314000 |
| 6                    | -4.396635000 | -0.878096000 | -2.030530000 | 1                                 | 5.216122000  | 1.096611000  | -2.046234000 |
| 1                    | -4.538389000 | -1.653676000 | -1.294833000 | 1                                 | 6.714428000  | 0.345607000  | -1.967592000 |
| 7                    | -3.971340000 | -1.198698000 | -3.228936000 | 6                                 | -2.963453000 | -2.348753000 | 0.379503000  |
| 6                    | -3.784528000 | -0.127507000 | -4.049610000 | 1                                 | -3.936608000 | -2.449910000 | -0.096805000 |
| 6                    | -4.516916000 | 1.501079000  | -2.435439000 | 1                                 | -2.417731000 | -3.291422000 | 0.301254000  |

|   |              |              |              |
|---|--------------|--------------|--------------|
| 1 | -3.091240000 | -2.131133000 | 1.441688000  |
| 6 | -2.120945000 | 2.957159000  | 4.023169000  |
| 1 | -1.460995000 | 2.950261000  | 4.893998000  |
| 1 | -2.602127000 | 3.936167000  | 3.963221000  |
| 1 | -2.897027000 | 2.210292000  | 4.180121000  |
| 6 | 2.238363000  | 3.379811000  | -2.637367000 |
| 1 | 2.970040000  | 3.361743000  | -3.444327000 |
| 1 | 1.393901000  | 3.995595000  | -2.956808000 |
| 1 | 2.677471000  | 3.830385000  | -1.748654000 |
| 6 | -0.329625000 | 0.551677000  | -8.375099000 |
| 1 | 0.559798000  | 0.092135000  | -8.813141000 |
| 1 | -1.172056000 | 0.336796000  | -9.026472000 |
| 1 | -0.195817000 | 1.634427000  | -8.338483000 |
| 6 | 4.643645000  | 0.347178000  | 3.302134000  |
| 1 | 4.356767000  | 1.037238000  | 4.099747000  |
| 1 | 5.132433000  | -0.519344000 | 3.750802000  |
| 1 | 5.373181000  | 0.834004000  | 2.658578000  |
| 1 | 5.534736000  | -3.792086000 | 1.734445000  |
| 1 | 7.271288000  | -1.988850000 | 2.249652000  |

<sup>5</sup>R'

|    |              |              |              |
|----|--------------|--------------|--------------|
| 6  | -0.180485000 | 2.097988000  | -5.401748000 |
| 1  | -0.514600000 | 1.540699000  | -6.279931000 |
| 1  | -0.895859000 | 2.904215000  | -5.250340000 |
| 7  | 0.486419000  | -0.025054000 | -4.170297000 |
| 1  | 0.876270000  | -0.476244000 | -4.978783000 |
| 6  | -0.131138000 | 1.229019000  | -4.175777000 |
| 6  | 0.474970000  | -0.526822000 | -2.907681000 |
| 1  | 0.883353000  | -1.472439000 | -2.607113000 |
| 7  | -0.146036000 | 0.330098000  | -2.098891000 |
| 6  | -0.530848000 | 1.427500000  | -2.877107000 |
| 1  | -1.058399000 | 2.253396000  | -2.442400000 |
| 6  | -1.788495000 | 3.978062000  | 1.463903000  |
| 1  | -2.852580000 | 4.200346000  | 1.548801000  |
| 1  | -1.306614000 | 4.299485000  | 2.390565000  |
| 6  | -1.572144000 | 2.488868000  | 1.289812000  |
| 8  | -0.613514000 | 2.077467000  | 0.496767000  |
| 8  | -2.234436000 | 1.693161000  | 2.021640000  |
| 6  | 5.447613000  | 1.358328000  | -0.957164000 |
| 1  | 6.048935000  | 1.993170000  | -0.300102000 |
| 1  | 5.788935000  | 0.333069000  | -0.820895000 |
| 7  | 3.279019000  | 2.652728000  | -0.716410000 |
| 1  | 3.687382000  | 3.547422000  | -0.922132000 |
| 6  | 3.982962000  | 1.449936000  | -0.650794000 |
| 6  | 1.967404000  | 2.424835000  | -0.473971000 |
| 1  | 1.187391000  | 3.157938000  | -0.437070000 |
| 7  | 1.788394000  | 1.124555000  | -0.226465000 |
| 6  | 3.036509000  | 0.506561000  | -0.340006000 |
| 1  | 3.115084000  | -0.550268000 | -0.176342000 |
| 6  | -5.009749000 | 0.328954000  | 6.305383000  |
| 1  | -6.042267000 | 0.331085000  | 5.949003000  |
| 1  | -4.982678000 | -0.180587000 | 7.264466000  |
| 7  | -4.105165000 | -0.390024000 | 5.380116000  |
| 1  | -3.745671000 | -1.277554000 | 5.687433000  |
| 6  | -3.697373000 | 0.062696000  | 4.173079000  |
| 7  | -4.279064000 | 1.163621000  | 3.650159000  |
| 1  | -5.093559000 | 1.580099000  | 4.058306000  |
| 1  | -3.735433000 | 1.641436000  | 2.913570000  |
| 7  | -2.715320000 | -0.531353000 | 3.486536000  |
| 1  | -2.130579000 | -1.273710000 | 3.839277000  |
| 1  | -2.381755000 | -0.134468000 | 2.593529000  |
| 26 | -0.035274000 | 0.278623000  | -0.012402000 |
| 8  | -1.512397000 | -0.425250000 | 0.300448000  |
| 6  | 1.150340000  | -3.590235000 | 1.085270000  |
| 1  | 0.686464000  | -3.974771000 | 0.174697000  |
| 1  | 2.223206000  | -3.517824000 | 0.904454000  |
| 6  | 0.580409000  | -2.219978000 | 1.399034000  |
| 8  | -0.110024000 | -1.972033000 | 2.400211000  |
| 8  | 0.917673000  | -1.280216000 | 0.491497000  |

|   |              |              |              |
|---|--------------|--------------|--------------|
| 7 | -3.494814000 | -0.339819000 | -5.373648000 |
| 6 | -4.552775000 | 0.683803000  | -0.083063000 |
| 1 | -3.602662000 | 0.656377000  | 0.449761000  |
| 1 | -5.231504000 | -0.058310000 | 0.338310000  |
| 1 | -5.013878000 | 1.664663000  | -0.038884000 |
| 6 | -3.967648000 | 1.025113000  | -3.732519000 |
| 7 | -3.886061000 | 1.822847000  | -4.863305000 |
| 6 | -3.573578000 | 0.974468000  | -5.831499000 |
| 1 | -3.450264000 | 1.222273000  | -6.869574000 |
| 7 | -4.299288000 | 0.366047000  | -1.507834000 |
| 6 | -4.033722000 | -0.947977000 | -1.888764000 |
| 1 | -4.020041000 | -1.667571000 | -1.088820000 |
| 7 | -3.765341000 | -1.333163000 | -3.115492000 |
| 6 | -3.725760000 | -0.317871000 | -4.021871000 |
| 6 | -4.285174000 | 1.392400000  | -2.424915000 |
| 7 | -4.562736000 | 2.658699000  | -2.098218000 |
| 1 | -3.859508000 | 3.234108000  | -1.635425000 |
| 1 | -5.074988000 | 3.189679000  | -2.787892000 |
| 1 | 5.667180000  | 1.644719000  | -1.989898000 |
| 1 | 0.795520000  | 2.537553000  | -5.628850000 |
| 1 | 0.960442000  | -4.282214000 | 1.904055000  |
| 1 | -4.672973000 | 1.355634000  | 6.451951000  |
| 1 | -1.363387000 | 4.544658000  | 0.637754000  |
| 1 | -3.288350000 | -1.159554000 | -5.916318000 |

<sup>5</sup>TS<sub>H,π</sub>

|    |              |              |              |
|----|--------------|--------------|--------------|
| 7  | 0.376268000  | -0.034721000 | -3.989944000 |
| 1  | 0.811889000  | -0.511900000 | -4.761532000 |
| 6  | -0.189432000 | 1.230228000  | -4.040606000 |
| 6  | 0.304679000  | -0.501140000 | -2.727451000 |
| 1  | 0.692382000  | -1.447046000 | -2.399934000 |
| 7  | -0.306297000 | 0.380650000  | -1.954714000 |
| 6  | -0.615231000 | 1.462358000  | -2.762723000 |
| 1  | -1.081632000 | 2.341697000  | -2.361729000 |
| 6  | -1.426951000 | 2.722963000  | 1.541134000  |
| 8  | -0.728055000 | 2.262255000  | 0.528012000  |
| 8  | -1.791650000 | 2.020797000  | 2.481055000  |
| 7  | 3.263786000  | 2.632119000  | -0.634063000 |
| 1  | 3.713256000  | 3.509483000  | -0.835905000 |
| 6  | 3.890145000  | 1.396844000  | -0.624051000 |
| 6  | 1.964857000  | 2.475980000  | -0.330911000 |
| 1  | 1.244431000  | 3.266218000  | -0.265142000 |
| 7  | 1.713782000  | 1.199255000  | -0.076353000 |
| 6  | 2.905035000  | 0.516164000  | -0.269257000 |
| 1  | 2.957382000  | -0.544080000 | -0.124641000 |
| 7  | -4.009089000 | -0.312073000 | 5.262949000  |
| 1  | -3.648120000 | -1.182584000 | 5.619928000  |
| 6  | -3.636145000 | 0.049416000  | 4.022538000  |
| 7  | -4.242136000 | 1.089711000  | 3.420944000  |
| 1  | -5.044529000 | 1.519387000  | 3.846405000  |
| 1  | -3.623222000 | 1.680434000  | 2.872296000  |
| 7  | -2.676116000 | -0.594156000 | 3.374957000  |
| 1  | -2.038357000 | -1.233642000 | 3.825319000  |
| 1  | -2.365898000 | -0.314710000 | 2.441750000  |
| 26 | -0.199496000 | 0.456106000  | 0.145856000  |
| 8  | -1.843437000 | -0.185040000 | 0.626376000  |
| 6  | 0.464160000  | -2.095795000 | 1.446282000  |
| 8  | -0.061951000 | -1.838377000 | 2.509335000  |
| 8  | 0.632714000  | -1.213324000 | 0.468928000  |
| 7  | -3.740867000 | -0.364598000 | -5.574671000 |
| 6  | -4.243795000 | 0.399568000  | -0.237264000 |
| 1  | -4.625049000 | -0.458570000 | 0.300675000  |
| 1  | -4.662908000 | 1.334934000  | 0.104696000  |
| 1  | -2.813751000 | 0.288050000  | 0.201527000  |
| 6  | -4.030880000 | 0.957271000  | -3.868420000 |
| 7  | -3.926410000 | 1.786720000  | -4.957726000 |
| 6  | -3.719856000 | 0.965595000  | -5.955257000 |
| 1  | -3.599565000 | 1.260468000  | -6.981732000 |
| 7  | -4.257902000 | 0.204263000  | -1.661373000 |

|                    |              |              |              |             |              |              |               |
|--------------------|--------------|--------------|--------------|-------------|--------------|--------------|---------------|
| 6                  | -4.167418000 | -1.093464000 | -2.145548000 | 7           | -3.830459000 | 1.850116000  | -4.610407000  |
| 1                  | -4.230228000 | -1.859870000 | -1.391072000 | 6           | -3.665665000 | 1.122019000  | -5.708405000  |
| 7                  | -4.006916000 | -1.436908000 | -3.386722000 | 1           | -3.543464000 | 1.511046000  | -6.702023000  |
| 6                  | -3.916302000 | -0.385540000 | -4.220564000 | 7           | -4.230824000 | -0.075228000 | -1.478738000  |
| 6                  | -4.196197000 | 1.273578000  | -2.520014000 | 6           | -4.213715000 | -1.332461000 | -2.092819000  |
| 7                  | -4.312689000 | 2.535086000  | -2.094977000 | 1           | -4.322636000 | -2.171325000 | -1.426667000  |
| 1                  | -4.314536000 | 3.265765000  | -2.791145000 | 7           | -4.069747000 | -1.533604000 | -3.373660000  |
| 1                  | -4.445610000 | 2.805773000  | -1.138949000 | 6           | -3.942421000 | -0.385397000 | -4.096030000  |
| 6                  | 5.385537000  | 1.216490000  | -0.944794000 | 6           | -4.085652000 | 1.102179000  | -2.206723000  |
| 1                  | 5.617516000  | 1.565948000  | -1.951877000 | 7           | -4.043546000 | 2.294939000  | -1.614068000  |
| 1                  | 6.007115000  | 1.763393000  | -0.234644000 | 1           | -4.031836000 | 3.111921000  | -2.206161000  |
| 1                  | 5.648144000  | 0.163119000  | -0.879901000 | 1           | -3.873656000 | 2.415134000  | -0.2615210000 |
| 6                  | 1.017753000  | -3.487795000 | 1.089253000  | 6           | -1.711640000 | 4.309142000  | 1.441489000   |
| 1                  | 2.068742000  | -3.417862000 | 0.810906000  | 1           | -1.176501000 | 4.428878000  | 2.385101000   |
| 1                  | 0.909880000  | -4.149010000 | 1.943697000  | 1           | -1.160839000 | 4.868279000  | 0.685309000   |
| 1                  | 0.468786000  | -3.893709000 | 0.239038000  | 1           | -2.716104000 | 4.706906000  | 1.543886000   |
| 6                  | -1.678906000 | 4.240357000  | 1.616190000  | 6           | 5.425366000  | 1.184715000  | -0.931508000  |
| 1                  | -2.592598000 | 4.431290000  | 2.173091000  | 1           | 5.647923000  | 1.482608000  | -1.957161000  |
| 1                  | -0.853220000 | 4.695088000  | 2.167054000  | 1           | 6.065249000  | 1.755865000  | -0.257581000  |
| 1                  | -1.725001000 | 4.704199000  | 0.632628000  | 1           | 5.673756000  | 0.131735000  | -0.820314000  |
| 6                  | -0.225885000 | 2.096671000  | -5.313221000 | 6           | -0.350302000 | 2.297968000  | -5.283228000  |
| 1                  | 0.760942000  | 2.504566000  | -5.537067000 | 1           | 0.643534000  | 2.680357000  | -5.519152000  |
| 1                  | -0.557053000 | 1.518938000  | -6.176917000 | 1           | -0.721630000 | 1.764535000  | -6.157492000  |
| 1                  | -0.916402000 | 2.924963000  | -5.173869000 | 1           | -1.011290000 | 3.140662000  | -5.094373000  |
| 6                  | -4.937845000 | 0.421192000  | 6.135092000  | 6           | 1.604836000  | -3.379841000 | 1.192712000   |
| 1                  | -5.973661000 | 0.327662000  | 5.803704000  | 1           | 2.618707000  | -3.055243000 | 1.431576000   |
| 1                  | -4.866672000 | 0.000865000  | 7.133597000  | 1           | 1.363611000  | -4.256750000 | 1.785694000   |
| 1                  | -4.662081000 | 1.473680000  | 6.197610000  | 1           | 1.564717000  | -3.618904000 | 0.131266000   |
| 1                  | -3.659873000 | -1.170155000 | -6.174721000 | 6           | -5.028397000 | 0.560501000  | 5.963332000   |
| ${}^5T_{H,\sigma}$ |              |              |              | 1           | -6.049137000 | 0.489018000  | 5.583641000   |
| 7                  | -0.149364000 | -0.014035000 | -4.166693000 | 1           | -5.009035000 | 0.120843000  | 6.955690000   |
| 1                  | -0.008489000 | -0.514586000 | -5.028458000 | 1           | -4.741405000 | 1.608138000  | 6.056703000   |
| 6                  | -0.306190000 | 1.371451000  | -4.053917000 | 1           | -3.725978000 | -0.995771000 | -6.109768000  |
| 6                  | -0.120359000 | -0.567563000 | -2.924395000 | ${}^5I_\pi$ |              |              |               |
| 1                  | 0.007107000  | -1.614071000 | -2.722296000 | 6           | -0.180583000 | 2.209271000  | -5.393963000  |
| 7                  | -0.267463000 | 0.394764000  | -2.011740000 | 1           | -0.507129000 | 1.669876000  | -6.286507000  |
| 6                  | -0.372941000 | 1.604031000  | -2.704357000 | 1           | -0.891689000 | 3.016042000  | -5.226191000  |
| 1                  | -0.493683000 | 2.536298000  | -2.189060000 | 7           | 0.471424000  | 0.057176000  | -4.198511000  |
| 6                  | -1.768654000 | 2.813656000  | 1.078394000  | 1           | 0.874930000  | -0.377790000 | -5.009259000  |
| 8                  | -0.658211000 | 2.204855000  | 0.780690000  | 6           | -0.134842000 | 1.317916000  | -4.186203000  |
| 8                  | -2.900368000 | 2.209995000  | 1.104520000  | 6           | 0.445489000  | -0.469082000 | -2.949898000  |
| 7                  | 3.311169000  | 2.642831000  | -0.641227000 | 1           | 0.839128000  | -1.424983000 | -2.661689000  |
| 1                  | 3.772102000  | 3.514381000  | -0.843082000 | 7           | -0.175123000 | 0.379632000  | -2.128469000  |
| 6                  | 3.935908000  | 1.396301000  | -0.602361000 | 6           | -0.540377000 | 1.496436000  | -2.889181000  |
| 6                  | 1.995131000  | 2.495037000  | -0.348525000 | 1           | -1.058915000 | 2.323378000  | -2.445161000  |
| 1                  | 1.290811000  | 3.297155000  | -0.262312000 | 6           | -1.872620000 | 4.168060000  | 1.346548000   |
| 7                  | 1.739667000  | 1.208866000  | -0.086059000 | 1           | -2.438840000 | 4.263280000  | 2.274072000   |
| 6                  | 2.944095000  | 0.519353000  | -0.246311000 | 1           | -0.871001000 | 4.567703000  | 1.490781000   |
| 1                  | 2.992009000  | -0.539458000 | -0.091802000 | 6           | -1.830857000 | 2.725590000  | 0.915318000   |
| 7                  | -4.075084000 | -0.173242000 | 5.118561000  | 8           | -0.708016000 | 2.181912000  | 0.583856000   |
| 1                  | -3.699106000 | -1.028232000 | 5.495757000  | 8           | -2.946298000 | 2.057061000  | 0.913471000   |
| 6                  | -3.654978000 | 0.196482000  | 3.888517000  | 6           | 5.437745000  | 1.325219000  | -0.894946000  |
| 7                  | -4.236246000 | 1.239883000  | 3.263168000  | 1           | 6.068367000  | 1.884591000  | -0.198025000  |
| 1                  | -5.042277000 | 1.687323000  | 3.662232000  | 1           | 5.750930000  | 0.282823000  | -0.852171000  |
| 1                  | -3.782755000 | 1.681540000  | 2.460338000  | 7           | 3.317602000  | 2.660048000  | -0.503520000  |
| 7                  | -2.648175000 | -0.451343000 | 3.289113000  | 1           | 3.754829000  | 3.553799000  | -0.644674000  |
| 1                  | -2.091476000 | -1.153712000 | 3.752798000  | 6           | 3.980557000  | 1.433258000  | -0.552807000  |
| 1                  | -2.360269000 | -0.288426000 | 2.320603000  | 6           | 2.003183000  | 2.457227000  | -0.244544000  |
| 26                 | -0.178774000 | 0.355372000  | 0.088787000  | 1           | 1.251622000  | 3.212332000  | -0.132941000  |
| 8                  | -1.840836000 | -0.308940000 | 0.517027000  | 7           | 1.780499000  | 1.147192000  | -0.095869000  |
| 6                  | 0.612882000  | -2.249266000 | 1.523507000  | 6           | 3.007966000  | 0.501204000  | -0.290996000  |
| 8                  | -0.180999000 | -2.280040000 | 2.474974000  | 1           | 3.062199000  | -0.567843000 | -0.219820000  |
| 8                  | 0.701297000  | -1.202759000 | 0.676296000  | 6           | -4.866626000 | 0.494626000  | 6.060765000   |
| 7                  | -3.745807000 | -0.243514000 | -5.438906000 | 1           | -5.898313000 | 0.330297000  | 5.740642000   |
| 6                  | -4.239412000 | -0.043071000 | -0.052601000 | 1           | -4.744556000 | 0.087160000  | 7.060464000   |
| 1                  | -4.572552000 | -0.978060000 | 0.377765000  | 7           | -3.893441000 | -0.180455000 | 5.169234000   |
| 1                  | -4.689273000 | 0.835994000  | 0.379392000  | 1           | -3.505124000 | -1.045382000 | 5.505216000   |
| 1                  | -2.921066000 | -0.007471000 | 0.305233000  | 6           | -3.546184000 | 0.179313000  | 3.908913000   |
| 6                  | -3.985058000 | 0.915437000  | -3.594315000 |             |              |              |               |

|    |              |              |              |   |              |              |              |
|----|--------------|--------------|--------------|---|--------------|--------------|--------------|
| 7  | -4.155877000 | 1.227504000  | 3.314322000  | 8 | -1.862496000 | -0.257934000 | 0.479107000  |
| 1  | -5.009879000 | 1.610565000  | 3.675153000  | 6 | 0.553713000  | -2.248526000 | 1.702897000  |
| 1  | -3.798497000 | 1.567283000  | 2.405563000  | 8 | 0.057314000  | -1.906034000 | 2.794303000  |
| 7  | -2.592644000 | -0.493058000 | 3.251233000  | 8 | 0.712805000  | -1.396489000 | 0.679053000  |
| 1  | -1.952411000 | -1.135070000 | 3.697168000  | 7 | -3.456125000 | 0.212335000  | -5.558281000 |
| 1  | -2.344396000 | -0.361942000 | 2.215214000  | 6 | -4.010650000 | -0.255205000 | -0.179533000 |
| 26 | -0.129384000 | 0.262957000  | -0.057706000 | 1 | -4.152199000 | -1.256022000 | 0.183890000  |
| 8  | -1.861158000 | -0.280864000 | 0.482155000  | 1 | -4.332908000 | 0.578273000  | 0.415848000  |
| 6  | 1.060449000  | -3.670035000 | 1.073797000  | 1 | -2.237431000 | 0.568654000  | 0.887019000  |
| 1  | 0.528581000  | -4.089909000 | 0.218594000  | 6 | -3.728130000 | 1.132727000  | -3.575074000 |
| 1  | 2.118800000  | -3.624280000 | 0.811672000  | 7 | -3.545793000 | 2.186276000  | -4.467013000 |
| 6  | 0.538688000  | -2.179808000 | 1.360216000  | 6 | -3.356723000 | 1.599803000  | -5.644690000 |
| 8  | 0.027407000  | -1.936015000 | 2.439215000  | 1 | -3.212067000 | 2.112785000  | -6.576663000 |
| 8  | 0.683060000  | -1.413896000 | 0.336079000  | 7 | -3.990656000 | -0.104227000 | -1.569050000 |
| 7  | -3.537031000 | -0.259410000 | -5.246758000 | 6 | -3.986023000 | -1.277030000 | -2.357282000 |
| 6  | -4.959335000 | 0.177725000  | -0.049247000 | 1 | -4.113434000 | -2.193593000 | -1.806908000 |
| 1  | -4.937350000 | -0.714326000 | 0.547305000  | 7 | -3.829825000 | -1.311757000 | -3.652232000 |
| 1  | -5.091073000 | 1.144777000  | 0.379124000  | 6 | -3.670423000 | -0.093380000 | -4.237852000 |
| 1  | -2.600282000 | 0.328007000  | 0.309302000  | 6 | -3.864197000 | 1.153380000  | -2.178013000 |
| 6  | -4.026592000 | 0.964556000  | -3.494074000 | 7 | -3.872429000 | 2.286257000  | -1.470695000 |
| 7  | -3.816368000 | 1.861945000  | -4.535296000 | 1 | -3.887792000 | 3.154984000  | -1.983770000 |
| 6  | -3.508955000 | 1.093912000  | -5.574029000 | 1 | -3.744137000 | 2.323946000  | -0.464527000 |
| 1  | -3.301364000 | 1.442701000  | -6.568713000 | 6 | 5.207054000  | 1.620191000  | -1.669234000 |
| 7  | -4.524202000 | 0.068543000  | -1.365340000 | 1 | 5.085274000  | 1.997499000  | -2.685812000 |
| 6  | -4.293317000 | -1.220118000 | -1.897837000 | 1 | 5.890937000  | 2.277939000  | -1.131413000 |
| 1  | -4.406865000 | -2.021595000 | -1.191657000 | 1 | 5.666395000  | 0.635669000  | -1.723728000 |
| 7  | -3.973994000 | -1.462290000 | -3.138811000 | 6 | 1.091322000  | -3.665125000 | 1.427536000  |
| 6  | -3.853122000 | -0.353547000 | -3.919343000 | 1 | 2.166125000  | -3.620875000 | 1.250254000  |
| 6  | -4.314546000 | 1.210264000  | -2.147055000 | 1 | 0.890796000  | -4.300424000 | 2.284526000  |
| 7  | -4.391667000 | 2.429209000  | -1.605532000 | 1 | 0.619912000  | -4.078219000 | 0.535927000  |
| 1  | -4.302024000 | 3.209556000  | -2.232845000 | 6 | -1.605110000 | 4.199069000  | 1.661405000  |
| 1  | -4.091171000 | 2.549307000  | -0.640150000 | 1 | -1.272423000 | 4.801140000  | 0.814690000  |
| 1  | 5.648667000  | 1.692210000  | -1.903769000 | 1 | -2.597269000 | 4.513039000  | 1.968343000  |
| 1  | 0.795785000  | 2.652755000  | -5.610536000 | 1 | -0.897836000 | 4.360950000  | 2.475084000  |
| 1  | -3.367767000 | -1.035980000 | -5.860054000 | 6 | -5.446916000 | 0.594912000  | 5.940761000  |
| 1  | -2.387160000 | 4.769292000  | 0.591942000  | 1 | -6.404439000 | 0.482103000  | 5.429169000  |
| 1  | -4.666791000 | 1.565778000  | 6.102773000  | 1 | -5.546246000 | 0.176223000  | 6.937237000  |
| 1  | 0.927746000  | -4.318481000 | 1.938155000  | 1 | -5.204757000 | 1.652360000  | 6.047646000  |

### <sup>5</sup>TS<sub>reb</sub>

|    |              |              |              |
|----|--------------|--------------|--------------|
| 7  | 0.090483000  | -0.251137000 | -3.994470000 |
| 1  | 0.393035000  | -0.795005000 | -4.785335000 |
| 6  | -0.335947000 | 1.074652000  | -4.042259000 |
| 6  | 0.120462000  | -0.658310000 | -2.701567000 |
| 1  | 0.437773000  | -1.626965000 | -2.364396000 |
| 7  | -0.305894000 | 0.330103000  | -1.918572000 |
| 6  | -0.607113000 | 1.418121000  | -2.740496000 |
| 1  | -0.938712000 | 2.358632000  | -2.347457000 |
| 6  | -1.611082000 | 2.708569000  | 1.274141000  |
| 8  | -0.525928000 | 2.132118000  | 0.890267000  |
| 8  | -2.724530000 | 2.037727000  | 1.319536000  |
| 7  | 3.123745000  | 2.702731000  | -0.726208000 |
| 1  | 3.475699000  | 3.632891000  | -0.877593000 |
| 6  | 3.839383000  | 1.535073000  | -0.966503000 |
| 6  | 1.881864000  | 2.389189000  | -0.305730000 |
| 1  | 1.128245000  | 3.094765000  | -0.030366000 |
| 7  | 1.766664000  | 1.062108000  | -0.208547000 |
| 6  | 3.004696000  | 0.511327000  | -0.566298000 |
| 1  | 3.164835000  | -0.548804000 | -0.561153000 |
| 7  | -4.368837000 | -0.125776000 | 5.248480000  |
| 1  | -4.048084000 | -0.978685000 | 5.679429000  |
| 6  | -3.823678000 | 0.205300000  | 4.055605000  |
| 7  | -4.342639000 | 1.242105000  | 3.369649000  |
| 1  | -5.190780000 | 1.682304000  | 3.679331000  |
| 1  | -3.811686000 | 1.682498000  | 2.616154000  |
| 7  | -2.783945000 | -0.472569000 | 3.545022000  |
| 1  | -2.224436000 | -1.113023000 | 4.087663000  |
| 1  | -2.460476000 | -0.362022000 | 2.592554000  |
| 26 | -0.064733000 | 0.261635000  | 0.150558000  |

|   |              |              |              |
|---|--------------|--------------|--------------|
| 6 | 0.553713000  | -2.248526000 | 1.702897000  |
| 8 | 0.057314000  | -1.906034000 | 2.794303000  |
| 8 | 0.712805000  | -1.396489000 | 0.679053000  |
| 7 | -3.456125000 | 0.212335000  | -5.558281000 |
| 6 | -4.010650000 | -0.255205000 | -0.179533000 |
| 1 | -4.152199000 | -1.256022000 | 0.183890000  |
| 1 | -4.332908000 | 0.578273000  | 0.415848000  |
| 1 | -2.237431000 | 0.568654000  | 0.887019000  |
| 6 | -3.728130000 | 1.132727000  | -3.575074000 |
| 7 | -3.545793000 | 2.186276000  | -4.467013000 |
| 6 | -3.356723000 | 1.599803000  | -5.644690000 |
| 1 | -3.212067000 | 2.112785000  | -6.576663000 |
| 7 | -3.990656000 | -0.104227000 | -1.569050000 |
| 6 | -3.986023000 | -1.277030000 | -2.357282000 |
| 1 | -4.113434000 | -2.193593000 | -1.806908000 |
| 7 | -3.829825000 | -1.311757000 | -3.652232000 |
| 6 | -3.670423000 | -0.093380000 | -4.237852000 |
| 6 | -3.864197000 | 1.153380000  | -2.178013000 |
| 7 | -3.872429000 | 2.286257000  | -1.470695000 |
| 1 | -3.887792000 | 3.154984000  | -1.983770000 |
| 1 | -3.744137000 | 2.323946000  | -0.464527000 |
| 6 | 5.207054000  | 1.620191000  | -1.669234000 |
| 1 | 5.085274000  | 1.997499000  | -2.685812000 |
| 1 | 5.890937000  | 2.277939000  | -1.131413000 |
| 1 | 5.666395000  | 0.635669000  | -1.723728000 |
| 6 | 1.091322000  | -3.665125000 | 1.427536000  |
| 1 | 2.166125000  | -3.620875000 | 1.250254000  |
| 1 | 0.890796000  | -4.300424000 | 2.284526000  |
| 1 | 0.619912000  | -4.078219000 | 0.535927000  |
| 6 | -1.605110000 | 4.199069000  | 1.661405000  |
| 1 | -1.272423000 | 4.801140000  | 0.814690000  |
| 1 | -2.597269000 | 4.513039000  | 1.968343000  |
| 1 | -0.897836000 | 4.360950000  | 2.475084000  |
| 6 | -5.446916000 | 0.594912000  | 5.940761000  |
| 1 | -6.404439000 | 0.482103000  | 5.429169000  |
| 1 | -5.546246000 | 0.176223000  | 6.937237000  |
| 1 | -5.204757000 | 1.652360000  | 6.047646000  |
| 6 | -0.325862000 | 1.869486000  | -5.361250000 |
| 1 | 0.698405000  | 2.140539000  | -5.625908000 |
| 1 | -0.735960000 | 1.287086000  | -6.184728000 |
| 1 | -0.897575000 | 2.785886000  | -5.252149000 |
| 1 | -3.423957000 | -0.450105000 | -6.317158000 |

### <sup>5</sup>P

|   |              |              |              |
|---|--------------|--------------|--------------|
| 6 | -0.052230000 | 2.224296000  | -5.370916000 |
| 1 | -0.367474000 | 1.658195000  | -6.250577000 |
| 1 | -0.798900000 | 2.998018000  | -5.201325000 |
| 7 | 0.674618000  | 0.096795000  | -4.178300000 |
| 1 | 1.051490000  | -0.341098000 | -4.999974000 |
| 6 | 0.050334000  | 1.347545000  | -4.151979000 |
| 6 | 0.707923000  | -0.411983000 | -2.916727000 |
| 1 | 1.119542000  | -1.366170000 | -2.649267000 |
| 7 | 0.107911000  | 0.429239000  | -2.076040000 |
| 6 | -0.308999000 | 1.528230000  | -2.838404000 |
| 1 | -0.846633000 | 2.336324000  | -2.383066000 |
| 6 | -1.743438000 | 4.041119000  | 1.306645000  |
| 1 | -1.681257000 | 4.137968000  | 2.394873000  |
| 1 | -0.843638000 | 4.462926000  | 0.865966000  |
| 6 | -1.890795000 | 2.581903000  | 0.937007000  |
| 8 | -0.962272000 | 1.965147000  | 0.308765000  |
| 8 | -2.987098000 | 1.974007000  | 1.287217000  |
| 6 | 5.806371000  | 1.638028000  | -1.178145000 |
| 1 | 6.437520000  | 2.328258000  | -0.610522000 |
| 1 | 6.184971000  | 0.631618000  | -1.003022000 |
| 7 | 3.627504000  | 2.896154000  | -0.847135000 |
| 1 | 3.992827000  | 3.783353000  | -1.142968000 |
| 6 | 4.367619000  | 1.718419000  | -0.771485000 |
| 6 | 2.338365000  | 2.641934000  | -0.509926000 |

|    |              |              |              |   |              |              |              |
|----|--------------|--------------|--------------|---|--------------|--------------|--------------|
| 1  | 1.551992000  | 3.369393000  | -0.478341000 | 8 | -2.326961000 | 1.107305000  | -0.425508000 |
| 7  | 2.216465000  | 1.353075000  | -0.192781000 | 6 | -3.250161000 | 0.601467000  | 0.339693000  |
| 6  | 3.471858000  | 0.767077000  | -0.353809000 | 8 | -2.879220000 | 0.044741000  | 1.444338000  |
| 1  | 3.628532000  | -0.277716000 | -0.162906000 | 6 | -4.690552000 | 0.629733000  | -0.065403000 |
| 6  | -4.731187000 | 0.539405000  | 6.484741000  | 1 | -5.331020000 | 0.686574000  | 0.812754000  |
| 1  | -5.800416000 | 0.389187000  | 6.318698000  | 1 | -4.936192000 | -0.288489000 | -0.605041000 |
| 1  | -4.479125000 | 0.178702000  | 7.478001000  | 1 | -4.890149000 | 1.468082000  | -0.729610000 |
| 7  | -3.909902000 | -0.201368000 | 5.501587000  | 6 | 2.038130000  | 1.263920000  | 0.327540000  |
| 1  | -3.558219000 | -1.099399000 | 5.789809000  | 8 | 0.900946000  | 0.585515000  | 0.056860000  |
| 6  | -3.737683000 | 0.112725000  | 4.199471000  | 6 | 2.751509000  | 1.770265000  | -0.900945000 |
| 7  | -4.365106000 | 1.180867000  | 3.661902000  | 1 | 3.076303000  | 0.930368000  | -1.520148000 |
| 1  | -5.138188000 | 1.628245000  | 4.118647000  | 1 | 3.619180000  | 2.355659000  | -0.610837000 |
| 1  | -3.988900000 | 1.584008000  | 2.790697000  | 1 | 2.076371000  | 2.375660000  | -1.509268000 |
| 7  | -2.938019000 | -0.614924000 | 3.411134000  | 8 | -0.645209000 | 2.027894000  | 1.578349000  |
| 1  | -2.172628000 | -1.221171000 | 3.681803000  | 8 | 2.479938000  | 1.415772000  | 1.480817000  |
| 1  | -3.102664000 | -0.599188000 | 2.402281000  | 7 | -1.487946000 | 5.821050000  | 1.399149000  |
| 26 | 0.383458000  | 0.435653000  | 0.049118000  | 6 | -1.494744000 | 7.256597000  | 1.597680000  |
| 8  | -3.815062000 | -0.302789000 | 0.713022000  | 6 | -1.818977000 | 5.244346000  | 0.211043000  |
| 6  | 0.697461000  | -3.712857000 | 1.117955000  | 6 | -1.906194000 | 8.044637000  | 0.449061000  |
| 1  | 0.462066000  | -4.421358000 | 1.909998000  | 7 | -2.206157000 | 6.060534000  | -0.818856000 |
| 1  | 0.364771000  | -4.115462000 | 0.159774000  | 6 | -2.252422000 | 7.448957000  | -0.703226000 |
| 6  | 0.017930000  | -2.374726000 | 1.374010000  | 1 | -1.927127000 | 9.113394000  | 0.576568000  |
| 8  | -0.749653000 | -2.185153000 | 2.342968000  | 1 | -2.429209000 | 5.638958000  | -1.705039000 |
| 8  | 0.291178000  | -1.438565000 | 0.462108000  | 1 | -2.577221000 | 7.976112000  | -1.585830000 |
| 7  | -3.452663000 | -0.278459000 | -5.362068000 | 6 | -1.158616000 | 4.983314000  | 2.582883000  |
| 6  | -4.944067000 | -0.065555000 | -0.080116000 | 1 | -2.078907000 | 4.599260000  | 3.021946000  |
| 1  | -5.674880000 | -0.842458000 | 0.140096000  | 1 | -0.518728000 | 4.144218000  | 2.317352000  |
| 1  | -5.384246000 | 0.914561000  | 0.103897000  | 6 | 0.390388000  | -4.455658000 | -1.486567000 |
| 1  | -3.273774000 | 0.551943000  | 0.795458000  | 1 | 0.666278000  | -5.309593000 | -0.863010000 |
| 6  | -3.943396000 | 0.885112000  | -3.572027000 | 1 | -0.269679000 | -4.818340000 | -2.278525000 |
| 7  | -3.627923000 | 1.817029000  | -4.552432000 | 1 | 1.299297000  | -4.088871000 | -1.960292000 |
| 6  | -3.318007000 | 1.083434000  | -5.614828000 | 6 | -0.934145000 | -1.656908000 | 6.341789000  |
| 1  | -3.039771000 | 1.462099000  | -6.580337000 | 1 | -1.995160000 | -1.899464000 | 6.312398000  |
| 7  | -4.655288000 | -0.123814000 | -1.516672000 | 1 | -0.391009000 | -2.580158000 | 6.564668000  |
| 6  | -4.484715000 | -1.343320000 | -2.133956000 | 1 | -0.779766000 | -0.968509000 | 7.177367000  |
| 1  | -4.701206000 | -2.199455000 | -1.511305000 | 1 | -0.659462000 | 5.627621000  | 3.296420000  |
| 7  | -4.123694000 | -1.556528000 | -3.373251000 | 8 | -1.177280000 | 7.722824000  | 2.694276000  |
| 6  | -3.845561000 | -0.417734000 | -4.062599000 | 7 | -1.791773000 | 3.937716000  | 0.045093000  |
| 6  | -4.276363000 | 1.073119000  | -2.222640000 | 1 | -2.078685000 | 3.469708000  | -0.806819000 |
| 7  | -4.300849000 | 2.285372000  | -1.654211000 | 1 | -1.404164000 | 3.266466000  | 0.739990000  |
| 1  | -4.431752000 | 3.073019000  | -2.265547000 |   |              |              |              |
| 1  | -3.811004000 | 2.474483000  | -0.789367000 |   |              |              |              |
| 1  | -4.503053000 | 1.604383000  | 6.443538000  |   |              |              |              |
| 1  | 0.900587000  | 2.708878000  | -5.606036000 |   |              |              |              |
| 1  | -3.296403000 | -1.033080000 | -6.006207000 |   |              |              |              |
| 1  | 5.943299000  | 1.861485000  | -2.240417000 |   |              |              |              |
| 1  | 1.777993000  | -3.573508000 | 1.057282000  |   |              |              |              |
| 1  | -2.614313000 | 4.614435000  | 0.982477000  |   |              |              |              |

**DFT Model calculations:**

<sup>5</sup>R<sub>Cyt</sub>:

|    |              |              |              |
|----|--------------|--------------|--------------|
| 26 | -0.738662000 | 0.464234000  | 1.032331000  |
| 7  | -0.321216000 | -0.245227000 | 2.948123000  |
| 6  | 0.872225000  | -0.110458000 | 3.536506000  |
| 7  | 0.791986000  | -0.601469000 | 4.806648000  |
| 6  | -0.507925000 | -1.058697000 | 5.041531000  |
| 6  | -1.184764000 | -0.827015000 | 3.867030000  |
| 1  | 1.726912000  | 0.362070000  | 3.076786000  |
| 1  | 1.545141000  | -0.614674000 | 5.473087000  |
| 1  | -2.214591000 | -0.994652000 | 3.620648000  |
| 7  | -0.838746000 | -1.452746000 | 0.350026000  |
| 6  | -1.752044000 | -2.378146000 | 0.654232000  |
| 7  | -1.418752000 | -3.549623000 | 0.049061000  |
| 6  | -0.243798000 | -3.366229000 | -0.690384000 |
| 6  | 0.101886000  | -2.054439000 | -0.493334000 |
| 1  | -2.610397000 | -2.222597000 | 1.277921000  |
| 1  | -1.938494000 | -4.408126000 | 0.115781000  |
| 1  | 0.924937000  | -1.489211000 | -0.878778000 |

<sup>5</sup>TS<sub>H,Cyt</sub>:

|    |              |              |              |
|----|--------------|--------------|--------------|
| 26 | -0.474112000 | 0.199991000  | 0.087696000  |
| 7  | 0.051741000  | 0.575262000  | 2.133660000  |
| 6  | 1.278766000  | 0.593328000  | 2.657989000  |
| 7  | 1.191647000  | 0.791261000  | 4.003954000  |
| 6  | -0.156306000 | 0.908755000  | 4.363050000  |
| 6  | -0.849029000 | 0.768882000  | 3.186697000  |
| 1  | 2.193221000  | 0.481944000  | 2.109735000  |
| 1  | 1.969320000  | 0.847031000  | 4.639597000  |
| 1  | -1.904848000 | 0.792186000  | 3.004795000  |
| 7  | -0.411579000 | -1.851040000 | 0.362423000  |
| 6  | 0.577217000  | -2.661996000 | -0.017812000 |
| 7  | 0.229276000  | -3.947825000 | 0.262642000  |
| 6  | -1.042294000 | -3.963937000 | 0.847783000  |
| 6  | -1.424907000 | -2.647406000 | 0.902966000  |
| 1  | 1.491299000  | -2.359178000 | -0.491505000 |
| 1  | 0.788940000  | -4.760756000 | 0.067659000  |
| 1  | -2.336309000 | -2.213993000 | 1.266412000  |
| 8  | -0.816392000 | 0.068633000  | -1.842746000 |
| 6  | -1.865983000 | 0.268860000  | -2.626221000 |
| 8  | -2.558621000 | 1.324846000  | -2.583657000 |
| 6  | -2.175965000 | -0.819581000 | -3.614482000 |
| 1  | -3.116377000 | -0.614336000 | -4.116474000 |
| 1  | -2.222538000 | -1.784129000 | -3.109226000 |
| 1  | -1.378167000 | -0.879092000 | -4.357335000 |
| 6  | 1.983543000  | 1.791322000  | -0.979108000 |
| 8  | 1.357856000  | 0.841974000  | -0.314253000 |
| 6  | 3.272733000  | 1.399865000  | -1.649360000 |

|   |              |              |              |
|---|--------------|--------------|--------------|
| 1 | 3.816838000  | 0.667822000  | -1.055851000 |
| 1 | 3.887748000  | 2.276758000  | -1.829203000 |
| 1 | 3.043207000  | 0.937581000  | -2.613007000 |
| 8 | -2.153933000 | 0.650962000  | 0.484551000  |
| 8 | 1.540345000  | 2.976959000  | -1.080282000 |
| 7 | -2.469577000 | 3.660914000  | 0.676685000  |
| 6 | -2.576956000 | 4.306359000  | 1.980835000  |
| 6 | -1.339580000 | 3.772691000  | -0.102065000 |
| 6 | -1.438406000 | 5.104365000  | 2.367913000  |
| 7 | -0.266687000 | 4.449299000  | 0.407229000  |
| 6 | -0.323002000 | 5.127299000  | 1.607848000  |
| 1 | -1.505934000 | 5.640155000  | 3.298724000  |
| 1 | 0.617741000  | 4.273335000  | -0.077134000 |
| 1 | 0.572298000  | 5.662245000  | 1.881604000  |
| 6 | -3.509939000 | 2.741102000  | 0.306366000  |
| 1 | -3.790166000 | 2.771263000  | -0.741238000 |
| 1 | -3.001288000 | 1.571594000  | 0.436237000  |
| 6 | -1.716395000 | -5.219788000 | 1.286338000  |
| 1 | -2.732835000 | -5.004004000 | 1.610006000  |
| 1 | -1.778374000 | -5.951929000 | 0.478428000  |
| 1 | -1.196499000 | -5.689404000 | 2.124738000  |
| 6 | -0.605669000 | 1.120458000  | 5.769609000  |
| 1 | -1.667888000 | 1.356954000  | 5.791276000  |
| 1 | -0.453512000 | 0.230032000  | 6.384427000  |
| 1 | -0.075993000 | 1.948359000  | 6.245935000  |
| 1 | -4.330510000 | 2.803958000  | 1.009002000  |
| 8 | -3.595508000 | 4.119137000  | 2.659887000  |
| 7 | -1.240429000 | 3.235915000  | -1.300266000 |
| 1 | -0.319346000 | 3.267228000  | -1.730672000 |
| 1 | -1.910183000 | 2.559492000  | -1.743072000 |

<sup>5</sup>R<sub>Thy</sub>:

|    |              |              |              |
|----|--------------|--------------|--------------|
| 26 | -0.646585000 | 0.767026000  | 1.172589000  |
| 7  | -0.437834000 | -0.282915000 | 2.937939000  |
| 6  | 0.721327000  | -0.458933000 | 3.570305000  |
| 7  | 0.477666000  | -1.089469000 | 4.756180000  |
| 6  | -0.898674000 | -1.314698000 | 4.885830000  |
| 6  | -1.453637000 | -0.802735000 | 3.740311000  |
| 1  | 1.677110000  | -0.102456000 | 3.210965000  |
| 1  | 1.177858000  | -1.331402000 | 5.434987000  |
| 1  | -2.480654000 | -0.729309000 | 3.439452000  |
| 7  | -0.787615000 | -1.013552000 | 0.138383000  |
| 6  | -1.797165000 | -1.883255000 | 0.146967000  |
| 7  | -1.489468000 | -2.937413000 | -0.662759000 |
| 6  | -0.220368000 | -2.728969000 | -1.216383000 |
| 6  | 0.199036000  | -1.528394000 | -0.704169000 |
| 1  | -2.712307000 | -1.762233000 | 0.691885000  |
| 1  | -2.080761000 | -3.730833000 | -0.837375000 |
| 1  | 1.109423000  | -0.985195000 | -0.856141000 |
| 8  | -1.972779000 | 1.594244000  | -0.213460000 |
| 6  | -3.079740000 | 1.204671000  | 0.354608000  |
| 8  | -3.001437000 | 0.453371000  | 1.394635000  |
| 6  | -4.392746000 | 1.662735000  | -0.202541000 |
| 1  | -5.206065000 | 1.066295000  | 0.202036000  |
| 1  | -4.384986000 | 1.607234000  | -1.289967000 |
| 1  | -4.555558000 | 2.707763000  | 0.069541000  |
| 6  | 2.288960000  | 1.427560000  | 0.956031000  |
| 8  | 1.167082000  | 0.847108000  | 0.506218000  |
| 6  | 2.900934000  | 2.434433000  | 0.016457000  |
| 1  | 2.996103000  | 2.012444000  | -0.984224000 |
| 1  | 3.873393000  | 2.750560000  | 0.383332000  |
| 1  | 2.241918000  | 3.301482000  | -0.061482000 |
| 8  | -0.591314000 | 2.202441000  | 1.988075000  |
| 8  | 2.805692000  | 1.139111000  | 2.056549000  |
| 7  | -1.085715000 | 5.943850000  | 1.712104000  |
| 6  | -1.263987000 | 5.147398000  | 0.586988000  |
| 6  | -1.191476000 | 7.330996000  | 1.649609000  |
| 6  | -1.545537000 | 5.646646000  | -0.645101000 |
| 7  | -1.480346000 | 7.821981000  | 0.383271000  |

|   |              |              |              |
|---|--------------|--------------|--------------|
| 6 | -1.671711000 | 7.087533000  | -0.801440000 |
| 1 | -1.561425000 | 8.825677000  | 0.308267000  |
| 6 | -0.779997000 | 5.350970000  | 3.027328000  |
| 1 | -1.575405000 | 5.581532000  | 3.734637000  |
| 1 | -0.685590000 | 4.275906000  | 2.907554000  |
| 6 | 0.421079000  | -3.691748000 | -2.157938000 |
| 1 | 0.553912000  | -4.679156000 | -1.707808000 |
| 1 | -0.160855000 | -3.817940000 | -3.074753000 |
| 1 | 1.406397000  | -3.327850000 | -2.444254000 |
| 6 | -1.502727000 | -1.973134000 | 6.080598000  |
| 1 | -2.584571000 | -2.026213000 | 5.968435000  |
| 1 | -1.135065000 | -2.993722000 | 6.217816000  |
| 1 | -1.296043000 | -1.418686000 | 6.999807000  |
| 1 | 0.148765000  | 5.766820000  | 3.413332000  |
| 1 | -1.159684000 | 4.086192000  | 0.763278000  |
| 8 | -1.040993000 | 8.070100000  | 2.643822000  |
| 8 | -1.929784000 | 7.683657000  | -1.870867000 |
| 6 | -1.728595000 | 4.780257000  | -1.859636000 |
| 1 | -1.682684000 | 3.724177000  | -1.596963000 |
| 1 | -2.689145000 | 4.984644000  | -2.338186000 |
| 1 | -0.961837000 | 4.991896000  | -2.609212000 |

<sup>5</sup>TS<sub>H,Thy</sub>:

|    |              |              |              |
|----|--------------|--------------|--------------|
| 26 | -0.931710000 | 1.347308000  | 1.733193000  |
| 7  | -0.454439000 | 0.178794000  | 3.406336000  |
| 6  | 0.770231000  | 0.043187000  | 3.915256000  |
| 7  | 0.685783000  | -0.676911000 | 5.071685000  |
| 6  | -0.654469000 | -1.008703000 | 5.312101000  |
| 6  | -1.349473000 | -0.465393000 | 4.262195000  |
| 1  | 1.665314000  | 0.476656000  | 3.487685000  |
| 1  | 1.463198000  | -0.910650000 | 5.663602000  |
| 1  | -2.402112000 | -0.458756000 | 4.055197000  |
| 7  | -0.944288000 | -0.411319000 | 0.436935000  |
| 6  | -1.815378000 | -1.417737000 | 0.438253000  |
| 7  | -1.439460000 | -2.351294000 | -0.487741000 |
| 6  | -0.265472000 | -1.914770000 | -1.113402000 |
| 6  | 0.024326000  | -0.710751000 | -0.523271000 |
| 1  | -2.682758000 | -1.481496000 | 1.065285000  |
| 1  | -1.924114000 | -3.208504000 | -0.686727000 |
| 1  | 0.839174000  | -0.035918000 | -0.691468000 |
| 8  | -2.578789000 | 2.107838000  | 0.410052000  |
| 6  | -3.483795000 | 1.450347000  | 1.065154000  |
| 8  | -3.115399000 | 0.667848000  | 2.024025000  |
| 6  | -4.936679000 | 1.627007000  | 0.729495000  |
| 1  | -5.515801000 | 0.776679000  | 1.081523000  |
| 1  | -5.065907000 | 1.756274000  | -0.343477000 |
| 1  | -5.318736000 | 2.524761000  | 1.221892000  |
| 6  | 2.004604000  | 2.177993000  | 1.337214000  |
| 8  | 0.834280000  | 1.653136000  | 0.970270000  |
| 6  | 2.494996000  | 3.312266000  | 0.471046000  |
| 1  | 2.453519000  | 3.033908000  | -0.582229000 |
| 1  | 3.509995000  | 3.584892000  | 0.746285000  |
| 1  | 1.840246000  | 4.175865000  | 0.602898000  |
| 8  | -1.045782000 | 2.840189000  | 2.679294000  |
| 8  | 2.668029000  | 1.757530000  | 2.312159000  |
| 7  | -1.493773000 | 5.728400000  | 1.302800000  |
| 6  | -1.636259000 | 5.118933000  | 0.055130000  |
| 6  | -0.727393000 | 6.899474000  | 1.465522000  |
| 6  | -1.094279000 | 5.619407000  | -1.082137000 |
| 7  | -0.183620000 | 7.381804000  | 0.286550000  |
| 6  | -0.311759000 | 6.845868000  | -1.008523000 |
| 1  | 0.362647000  | 8.227480000  | 0.369523000  |
| 6  | -2.064728000 | 5.116857000  | 2.465302000  |
| 1  | -3.094150000 | 4.807304000  | 2.308252000  |
| 1  | -1.487093000 | 4.014744000  | 2.674942000  |
| 6  | 0.421690000  | -2.695487000 | -2.183075000 |
| 1  | 0.746105000  | -3.678512000 | -1.830699000 |
| 1  | -0.218676000 | -2.848929000 | -3.056011000 |
| 1  | 1.308463000  | -2.160164000 | -2.518723000 |



|   |              |              |              |   |              |              |              |
|---|--------------|--------------|--------------|---|--------------|--------------|--------------|
| 6 | -1.093601000 | -1.786654000 | 6.507100000  | 6 | 0.280176000  | 2.133571000  | -6.415178000 |
| 1 | -2.175220000 | -1.912709000 | 6.491188000  | 1 | 0.659535000  | 3.118020000  | -6.697058000 |
| 1 | -0.646041000 | -2.784063000 | 6.536825000  | 1 | 0.789944000  | 1.389711000  | -7.031169000 |
| 1 | -0.837171000 | -1.279561000 | 7.441242000  | 1 | -0.776533000 | 2.104554000  | -6.673140000 |
| 1 | -1.909334000 | 5.731544000  | 3.342646000  | 6 | -4.341488000 | -1.463249000 | 4.994323000  |
| 1 | -2.182242000 | 4.184356000  | 0.069716000  | 1 | -5.408614000 | -1.254842000 | 5.086282000  |
| 8 | -0.563703000 | 7.459233000  | 2.563569000  | 1 | -4.188960000 | -2.513825000 | 5.220745000  |
| 8 | 0.233890000  | 7.416234000  | -1.976049000 | 1 | -3.785682000 | -0.880277000 | 5.730340000  |
| 6 | -1.249552000 | 4.956251000  | -2.420426000 | 1 | -7.028824000 | -3.250823000 | -3.590038000 |
| 1 | -1.803569000 | 4.022936000  | -2.329340000 | 7 | -4.784730000 | 0.850884000  | -1.305438000 |
| 1 | -1.771689000 | 5.609407000  | -3.123425000 | 1 | -4.695051000 | 1.679767000  | -0.723849000 |
| 1 | -0.274426000 | 4.740940000  | -2.861710000 | 1 | -3.875585000 | 0.499323000  | -1.606184000 |

<sup>5</sup>R<sub>Gua</sub>:

|    |              |              |              |
|----|--------------|--------------|--------------|
| 7  | 1.719405000  | 1.841754000  | -4.343992000 |
| 1  | 2.597671000  | 1.991367000  | -4.813324000 |
| 6  | 0.462494000  | 1.866327000  | -4.959896000 |
| 6  | 1.569836000  | 1.581571000  | -3.020690000 |
| 1  | 2.376580000  | 1.498901000  | -2.320034000 |
| 7  | 0.266330000  | 1.433001000  | -2.749194000 |
| 6  | -0.429337000 | 1.605921000  | -3.951747000 |
| 1  | -1.497129000 | 1.529305000  | -3.985133000 |
| 6  | -2.408961000 | 3.250312000  | 0.103438000  |
| 8  | -1.242587000 | 2.694603000  | -0.161164000 |
| 8  | -3.436398000 | 2.584840000  | 0.442871000  |
| 7  | 2.688019000  | 2.502388000  | 1.122316000  |
| 1  | 3.184067000  | 3.248496000  | 1.581753000  |
| 6  | 3.134831000  | 1.178581000  | 1.020267000  |
| 6  | 1.475045000  | 2.617891000  | 0.523148000  |
| 1  | 0.888434000  | 3.511931000  | 0.462384000  |
| 7  | 1.116108000  | 1.426043000  | 0.031418000  |
| 6  | 2.142545000  | 0.522221000  | 0.336726000  |
| 1  | 2.060253000  | -0.511204000 | 0.068321000  |
| 7  | -3.857136000 | -1.210655000 | 3.630532000  |
| 1  | -3.483587000 | -1.987966000 | 3.110568000  |
| 6  | -3.874506000 | -0.010369000 | 3.014876000  |
| 7  | -4.378725000 | 1.066180000  | 3.659860000  |
| 1  | -4.755804000 | 1.007575000  | 4.587943000  |
| 1  | -4.385703000 | 1.965991000  | 3.211406000  |
| 7  | -3.403183000 | 0.121510000  | 1.775586000  |
| 1  | -2.997908000 | -0.657064000 | 1.245439000  |
| 1  | -3.415320000 | 1.021641000  | 1.288596000  |
| 26 | -0.613189000 | 1.012911000  | -0.943876000 |
| 8  | -2.060142000 | 0.670513000  | -1.687689000 |
| 6  | -1.063378000 | -1.872906000 | -0.241278000 |
| 8  | -2.254077000 | -1.818777000 | 0.163926000  |
| 8  | -0.295583000 | -0.797681000 | -0.402923000 |
| 7  | -7.636534000 | -2.580059000 | -3.151730000 |
| 6  | -8.484879000 | -0.826755000 | -2.114503000 |
| 7  | -9.564671000 | -1.586217000 | -2.550454000 |
| 6  | -9.038966000 | -2.624887000 | -3.165973000 |
| 1  | -9.580500000 | -3.425447000 | -3.633209000 |
| 7  | -7.117435000 | 0.895034000  | -1.224683000 |
| 6  | -5.955852000 | 0.278236000  | -1.571261000 |
| 7  | -6.019499000 | -0.944739000 | -2.185699000 |
| 6  | -7.293586000 | -1.433938000 | -2.480529000 |
| 6  | -8.486696000 | 0.422939000  | -1.413044000 |
| 6  | 4.431580000  | 0.714994000  | 1.591923000  |
| 1  | 5.281474000  | 1.247502000  | 1.159648000  |
| 1  | 4.468697000  | 0.852006000  | 2.674777000  |
| 1  | 4.573131000  | -0.345204000 | 1.391717000  |
| 6  | -0.386570000 | -3.180584000 | -0.547890000 |
| 1  | 0.481866000  | -3.313816000 | 0.098680000  |
| 1  | -1.075626000 | -4.005544000 | -0.395967000 |
| 1  | -0.024496000 | -3.185616000 | -1.576568000 |
| 6  | -2.449851000 | 4.750961000  | 0.015193000  |
| 1  | -3.452856000 | 5.116588000  | 0.211297000  |
| 1  | -1.763406000 | 5.188284000  | 0.742261000  |
| 1  | -2.124047000 | 5.078957000  | -0.972194000 |

<sup>5</sup>TS<sub>H,Gua</sub>:

|    |              |              |              |
|----|--------------|--------------|--------------|
| 7  | 1.551189000  | -1.239903000 | -3.943242000 |
| 1  | 2.124399000  | -1.940628000 | -4.383696000 |
| 6  | 1.040168000  | -0.103030000 | -4.576751000 |
| 6  | 1.158160000  | -1.243972000 | -2.639796000 |
| 1  | 1.418010000  | -1.995039000 | -1.919485000 |
| 7  | 0.414393000  | -0.160909000 | -2.403764000 |
| 6  | 0.334322000  | 0.557955000  | -3.601307000 |
| 1  | -0.204037000 | 1.483751000  | -3.659958000 |
| 6  | -1.956070000 | 2.939897000  | -0.499608000 |
| 8  | -1.015879000 | 2.174770000  | -1.037146000 |
| 8  | -2.624817000 | 2.600472000  | 0.515129000  |
| 7  | 2.925535000  | 2.701297000  | 0.258345000  |
| 1  | 3.477371000  | 3.534466000  | 0.135494000  |
| 6  | 3.286755000  | 1.604821000  | 1.052374000  |
| 6  | 1.720734000  | 2.465835000  | -0.316769000 |
| 1  | 1.201657000  | 3.133229000  | -0.974360000 |
| 7  | 1.280814000  | 1.261212000  | 0.071072000  |
| 6  | 2.251381000  | 0.716192000  | 0.921464000  |
| 1  | 2.120675000  | -0.255447000 | 1.349948000  |
| 7  | -3.239995000 | 0.447119000  | 4.581733000  |
| 1  | -3.010950000 | -0.532847000 | 4.586424000  |
| 6  | -3.160460000 | 1.099464000  | 3.403345000  |
| 7  | -3.470437000 | 2.409620000  | 3.325265000  |
| 1  | -3.800083000 | 2.931399000  | 4.116008000  |
| 1  | -3.357685000 | 2.884046000  | 2.438408000  |
| 7  | -2.784587000 | 0.464386000  | 2.288188000  |
| 1  | -2.426083000 | -0.490242000 | 2.243688000  |
| 1  | -2.710152000 | 1.015089000  | 1.433665000  |
| 26 | -0.400656000 | 0.391465000  | -0.562616000 |
| 8  | -2.036427000 | -0.317323000 | -0.722436000 |
| 6  | -0.488455000 | -2.125788000 | 1.106439000  |
| 8  | -1.630218000 | -1.994584000 | 1.622476000  |
| 8  | 0.148279000  | -1.160230000 | 0.446504000  |
| 7  | -6.623064000 | 1.217826000  | -2.645067000 |
| 1  | -2.856240000 | 0.005345000  | -1.486373000 |
| 6  | -7.562616000 | -0.077684000 | -1.127042000 |
| 7  | -8.569676000 | 0.738091000  | -1.624062000 |
| 6  | -7.990074000 | 1.503544000  | -2.526599000 |
| 1  | -8.470638000 | 2.260297000  | -3.117371000 |
| 7  | -6.346010000 | -1.731270000 | 0.064778000  |
| 6  | -5.160650000 | -1.412110000 | -0.512682000 |
| 7  | -5.146106000 | -0.444536000 | -1.507247000 |
| 6  | -6.357772000 | 0.215803000  | -1.746093000 |
| 6  | -7.658105000 | -1.124908000 | -0.153165000 |
| 6  | 4.560303000  | 1.550775000  | 1.825496000  |
| 1  | 5.434138000  | 1.625177000  | 1.174656000  |
| 1  | 4.622666000  | 2.354883000  | 2.561867000  |
| 1  | 4.632817000  | 0.608000000  | 2.364032000  |
| 6  | 0.271987000  | -3.422482000 | 1.212055000  |

|   |              |              |              |
|---|--------------|--------------|--------------|
| 1 | -0.196684000 | -4.072336000 | 1.944683000  |
| 1 | 0.275573000  | -3.930099000 | 0.244586000  |
| 1 | 1.309664000  | -3.242250000 | 1.488459000  |
| 6 | -2.149594000 | 4.281736000  | -1.154457000 |
| 1 | -3.162272000 | 4.639125000  | -0.985997000 |
| 1 | -1.464801000 | 5.006627000  | -0.707069000 |
| 1 | -1.935049000 | 4.236851000  | -2.219409000 |
| 6 | 1.294843000  | 0.207915000  | -6.012912000 |
| 1 | 2.360747000  | 0.325574000  | -6.219379000 |
| 1 | 0.912533000  | -0.573765000 | -6.672842000 |
| 1 | 0.804302000  | 1.139317000  | -6.289122000 |
| 6 | -3.627108000 | 1.066968000  | 5.856230000  |
| 1 | -4.652507000 | 1.438856000  | 5.826186000  |
| 1 | -3.571178000 | 0.311904000  | 6.634146000  |
| 1 | -2.948488000 | 1.876858000  | 6.127777000  |
| 1 | -5.990510000 | 1.665650000  | -3.285386000 |
| 6 | -3.964788000 | -0.211486000 | -2.299675000 |
| 1 | -3.607691000 | -1.104007000 | -2.806479000 |
| 1 | -4.060573000 | 0.654713000  | -2.939610000 |
| 7 | -4.023468000 | -1.989648000 | -0.137277000 |
| 1 | -4.016999000 | -2.719540000 | 0.558280000  |
| 1 | -3.103367000 | -1.535979000 | -0.309099000 |
| 1 | -6.362331000 | -2.442136000 | 0.785648000  |
| 8 | -8.610066000 | -1.544667000 | 0.493646000  |

<sup>5</sup>R<sub>Ade</sub>:

|    |              |              |              |
|----|--------------|--------------|--------------|
| 6  | 0.870825000  | 2.592123000  | -5.791586000 |
| 1  | 1.176342000  | 1.830963000  | -6.512746000 |
| 1  | -0.194614000 | 2.765627000  | -5.929892000 |
| 7  | 2.430773000  | 1.871252000  | -3.923267000 |
| 1  | 3.270997000  | 1.907895000  | -4.476517000 |
| 6  | 1.144949000  | 2.168622000  | -4.388531000 |
| 6  | 2.365855000  | 1.522630000  | -2.611932000 |
| 1  | 3.208887000  | 1.238522000  | -2.014086000 |
| 7  | 1.092263000  | 1.579411000  | -2.205634000 |
| 6  | 0.325592000  | 1.978334000  | -3.305519000 |
| 1  | -0.736392000 | 2.089632000  | -3.222331000 |
| 6  | -0.565589000 | 5.027142000  | 1.227963000  |
| 1  | -1.480804000 | 5.564307000  | 1.457970000  |
| 1  | 0.153827000  | 5.202371000  | 2.030782000  |
| 6  | -0.842587000 | 3.552805000  | 1.101059000  |
| 8  | 0.160996000  | 2.832119000  | 0.621374000  |
| 8  | -1.943032000 | 3.056959000  | 1.469619000  |
| 6  | 5.468980000  | -0.322881000 | 1.584403000  |
| 1  | 5.627769000  | -0.314143000 | 2.664947000  |
| 1  | 5.388728000  | -1.363030000 | 1.274661000  |
| 7  | 4.060467000  | 1.788472000  | 1.464911000  |
| 1  | 4.728366000  | 2.381173000  | 1.929606000  |
| 6  | 4.236802000  | 0.424119000  | 1.200580000  |
| 6  | 2.839371000  | 2.180411000  | 1.016717000  |
| 1  | 2.427037000  | 3.165459000  | 1.098574000  |
| 7  | 2.216464000  | 1.130974000  | 0.468734000  |
| 6  | 3.078581000  | 0.031967000  | 0.578542000  |
| 1  | 2.776226000  | -0.935366000 | 0.233166000  |
| 6  | -4.122486000 | -0.639840000 | 5.196897000  |
| 1  | -5.080683000 | -0.118519000 | 5.230979000  |
| 1  | -4.299087000 | -1.675386000 | 5.470764000  |
| 7  | -3.540750000 | -0.610872000 | 3.849724000  |
| 1  | -3.377566000 | -1.489120000 | 3.385616000  |
| 6  | -3.180549000 | 0.511318000  | 3.190709000  |
| 7  | -3.371125000 | 1.724436000  | 3.755358000  |
| 1  | -3.780597000 | 1.837379000  | 4.663790000  |
| 1  | -3.056369000 | 2.545411000  | 3.256427000  |
| 7  | -2.643053000 | 0.450546000  | 1.972202000  |
| 1  | -2.360011000 | -0.412766000 | 1.498343000  |
| 1  | -2.328332000 | 1.328572000  | 1.550924000  |
| 26 | 0.338862000  | 1.145516000  | -0.330224000 |
| 8  | -1.224017000 | 1.156927000  | -0.897234000 |
| 6  | 0.029042000  | -3.076232000 | -0.480939000 |

|   |              |              |              |
|---|--------------|--------------|--------------|
| 1 | 0.428964000  | -2.988897000 | -1.490944000 |
| 1 | 0.840854000  | -3.418847000 | 0.163107000  |
| 6 | -0.479131000 | -1.743025000 | -0.001928000 |
| 8 | -1.636469000 | -1.605557000 | 0.462090000  |
| 8 | 0.410806000  | -0.751049000 | -0.083777000 |
| 7 | -5.917936000 | -2.730797000 | -3.751514000 |
| 6 | -4.392481000 | 1.879425000  | -1.161989000 |
| 1 | -3.343788000 | 1.805111000  | -0.890963000 |
| 1 | -4.984244000 | 2.019155000  | -0.258488000 |
| 1 | -4.518568000 | 2.728060000  | -1.833814000 |
| 6 | -6.344738000 | -0.704512000 | -3.018847000 |
| 7 | -7.506997000 | -1.131669000 | -3.646088000 |
| 6 | -7.218765000 | -2.353326000 | -4.076323000 |
| 1 | -7.891033000 | -2.995805000 | -4.613722000 |
| 7 | -4.798427000 | 0.628237000  | -1.851326000 |
| 6 | -3.870257000 | -0.415337000 | -1.948413000 |
| 1 | -2.911620000 | -0.225214000 | -1.490320000 |
| 7 | -4.103650000 | -1.562753000 | -2.545090000 |
| 6 | -5.350336000 | -1.682662000 | -3.074538000 |
| 6 | -6.069680000 | 0.513301000  | -2.379376000 |
| 7 | -6.974354000 | 1.496251000  | -2.287200000 |
| 1 | -6.807846000 | 2.373603000  | -1.827617000 |
| 1 | -7.881829000 | 1.343628000  | -2.701858000 |
| 1 | 6.362355000  | 0.092743000  | 1.113153000  |
| 1 | 1.389216000  | 3.519450000  | -6.044779000 |
| 1 | -0.772728000 | -3.807750000 | -0.462382000 |
| 1 | -3.444130000 | -0.210393000 | 5.936010000  |
| 1 | -0.128490000 | 5.413193000  | 0.308114000  |
| 1 | -5.469087000 | -3.606708000 | -3.965905000 |

<sup>5</sup>TS<sub>H,Ade</sub>:

|    |              |              |              |
|----|--------------|--------------|--------------|
| 7  | 2.087352000  | 1.619551000  | -4.204554000 |
| 1  | 2.720960000  | 1.287885000  | -4.913036000 |
| 6  | 1.490337000  | 2.883810000  | -4.185788000 |
| 6  | 1.682839000  | 0.915066000  | -3.111402000 |
| 1  | 1.996146000  | -0.081256000 | -2.867308000 |
| 7  | 0.849851000  | 1.667177000  | -2.389101000 |
| 6  | 0.723147000  | 2.895709000  | -3.046333000 |
| 1  | 0.112610000  | 3.680647000  | -2.644508000 |
| 6  | -1.716498000 | 3.192448000  | 0.736434000  |
| 8  | -0.731757000 | 2.865638000  | -0.091579000 |
| 8  | -2.347537000 | 2.342208000  | 1.421065000  |
| 7  | 3.138773000  | 2.816031000  | 1.494896000  |
| 1  | 3.645154000  | 3.615724000  | 1.837869000  |
| 6  | 3.534721000  | 1.481397000  | 1.654015000  |
| 6  | 1.969750000  | 2.861948000  | 0.809426000  |
| 1  | 1.435030000  | 3.751898000  | 0.548590000  |
| 7  | 1.587680000  | 1.612268000  | 0.515981000  |
| 6  | 2.557480000  | 0.745672000  | 1.035509000  |
| 1  | 2.468488000  | -0.313396000 | 0.911173000  |
| 7  | -2.973957000 | -1.689560000 | 3.612488000  |
| 1  | -2.746176000 | -2.514791000 | 3.083313000  |
| 6  | -2.894908000 | -0.501840000 | 2.975356000  |
| 7  | -3.239973000 | 0.637677000  | 3.609380000  |
| 1  | -3.610250000 | 0.641776000  | 4.541404000  |
| 1  | -3.114943000 | 1.518824000  | 3.126479000  |
| 7  | -2.482784000 | -0.430793000 | 1.707089000  |
| 1  | -2.071712000 | -1.200650000 | 1.177404000  |
| 1  | -2.422708000 | 0.490416000  | 1.278190000  |
| 26 | -0.018759000 | 1.121720000  | -0.563210000 |
| 8  | -1.608138000 | 0.530176000  | -1.145534000 |
| 6  | 0.034993000  | -1.886548000 | -0.515109000 |
| 8  | -1.113960000 | -2.103565000 | -0.054543000 |
| 8  | 0.626220000  | -0.689358000 | -0.519564000 |
| 7  | -8.119627000 | -1.072917000 | -2.126404000 |
| 6  | -3.300898000 | 1.433735000  | -2.740176000 |
| 1  | -3.391660000 | 2.508492000  | -2.829575000 |
| 1  | -2.768299000 | 0.948948000  | -3.553543000 |
| 1  | -2.349985000 | 1.178355000  | -1.730053000 |

|   |              |              |              |
|---|--------------|--------------|--------------|
| 6 | -5.922575000 | -1.096804000 | -2.060501000 |
| 7 | -6.324825000 | -2.397637000 | -1.791924000 |
| 6 | -7.651305000 | -2.352915000 | -1.847687000 |
| 1 | -8.307215000 | -3.190472000 | -1.701019000 |
| 7 | -4.565313000 | 0.800197000  | -2.438391000 |
| 6 | -5.746242000 | 1.555575000  | -2.585981000 |
| 1 | -5.599494000 | 2.601001000  | -2.800333000 |
| 7 | -6.957592000 | 1.074990000  | -2.506928000 |
| 6 | -7.022095000 | -0.265534000 | -2.263905000 |
| 6 | -4.621162000 | -0.557748000 | -2.104632000 |
| 7 | -3.524933000 | -1.256370000 | -1.840155000 |
| 1 | -3.632901000 | -2.238455000 | -1.629434000 |
| 1 | -2.622198000 | -0.816041000 | -1.605532000 |
| 6 | 4.782063000  | 1.087378000  | 2.369290000  |
| 1 | 5.672024000  | 1.506669000  | 1.895002000  |
| 1 | 4.773487000  | 1.414002000  | 3.411430000  |
| 1 | 4.889638000  | 0.004526000  | 2.367006000  |
| 6 | 0.867239000  | -2.996481000 | -1.103134000 |
| 1 | 0.423982000  | -3.959399000 | -0.868757000 |
| 1 | 0.915783000  | -2.887684000 | -2.189150000 |
| 1 | 1.887970000  | -2.956797000 | -0.725747000 |
| 6 | -2.008032000 | 4.665033000  | 0.846167000  |
| 1 | -3.057053000 | 4.821546000  | 1.085447000  |
| 1 | -1.417546000 | 5.092667000  | 1.660463000  |
| 1 | -1.747232000 | 5.190166000  | -0.068940000 |
| 6 | 1.731481000  | 3.909307000  | -5.241441000 |
| 1 | 2.785111000  | 4.190444000  | -5.300942000 |
| 1 | 1.425112000  | 3.556967000  | -6.228758000 |
| 1 | 1.164317000  | 4.812623000  | -5.025172000 |
| 6 | -3.375386000 | -1.860741000 | 5.014116000  |
| 1 | -4.413457000 | -1.564596000 | 5.175699000  |
| 1 | -3.286319000 | -2.912191000 | 5.269200000  |
| 1 | -2.724221000 | -1.298837000 | 5.685247000  |
| 1 | -9.080389000 | -0.782646000 | -2.217816000 |
